*Pandey et al., submitted for review.*

## 1 **DNA from dust: comparative genomics of vaccine-break virus in the field**

2  
3 Utsav Pandey<sup>1</sup>, Andrew S. Bell<sup>2</sup>, Daniel Renner<sup>1</sup>, David A. Kennedy<sup>2</sup>, Jacob Shreve<sup>1</sup>, Chris L.  
4 Cairns<sup>2</sup>, Matthew J. Jones<sup>2</sup>, Patricia A. Dunn<sup>3</sup>, Andrew F. Read<sup>2</sup>, Moriah L. Szpara<sup>1#</sup>

5  
6 <sup>1</sup>Department of Biochemistry and Molecular Biology, Center for Infectious Disease Dynamics,  
7 and the Huck Institutes of the Life Sciences, Pennsylvania State University, University Park,  
8 Pennsylvania, 16802, USA

9 <sup>2</sup>Center for Infectious Disease Dynamics, Departments of Biology and Entomology,  
10 Pennsylvania State University, University Park, Pennsylvania 16802, USA

11 <sup>3</sup>Department of Veterinary and Biomedical Sciences, Pennsylvania State University, University  
12 Park, Pennsylvania, 16802, USA

### 13 **#Corresponding Author**

14 Moriah L. Szpara  
15 Dept. of Biochemistry & Molecular Biology  
16 The Huck Institutes of the Life Sciences  
17 W-208 Millennium Science Complex (MSC)  
18 Pennsylvania State University  
19 University Park, PA 16802 USA  
20 Phone: 814-867-0008  
21 Email: [moriah@psu.edu](mailto:moriah@psu.edu)

### 22 **Author emails:**

23 Utsav Pandey: [uup104@psu.edu](mailto:uup104@psu.edu)  
24 Andrew S. Bell: [asb15@psu.edu](mailto:asb15@psu.edu)  
25 Daniel W. Renner: [dwr19@psu.edu](mailto:dwr19@psu.edu)  
26 David Kennedy: [dak30@psu.edu](mailto:dak30@psu.edu)  
27 Jacob T. Shreve: [jtshreve@iu.edu](mailto:jtshreve@iu.edu) (Present address: Indiana University School of Medicine)  
28 Chris Cairns: [clc5303@psu.edu](mailto:clc5303@psu.edu)  
29 Matthew Jones: [mjj16@psu.edu](mailto:mjj16@psu.edu)  
30 Patricia Dunn: [pad7@psu.edu](mailto:pad7@psu.edu)  
31 Andrew Read: [a.read@psu.edu](mailto:a.read@psu.edu)  
32 Moriah L. Szpara: [moriah@psu.edu](mailto:moriah@psu.edu)

33  
34  
35 **Running title:** Comparative genomics of vaccine-break MDV-1

36  
37 **Word counts:** Abstract, 151; Importance, 132; Intro/Results/Discussion, 3800; Methods, 2956.

*Pandey et al., submitted for review.*

## 38 **Abstract**

39 The intensification of the poultry industry over the last sixty years facilitated the evolution of  
40 increased virulence and vaccine breaks in Marek's disease virus (MDV). Full genome sequences  
41 are essential for understanding why and how this evolution occurred, but what is known about  
42 genome-wide variation in MDV comes from laboratory culture. To rectify this, we developed  
43 methods for obtaining high quality genome sequences direct from field samples without the need  
44 for sequence-based enrichment strategies prior to sequencing. We found that viral genomes from  
45 adjacent field sites had high levels of overall DNA identity, and despite strong evidence of  
46 purifying selection, had coding variations in proteins associated with virulence and manipulation  
47 of host immunity. Our methods empower ecological field surveillance, make it possible to  
48 determine the basis of viral virulence and vaccine breaks, and can be used to obtain full genomes  
49 from clinical samples of other large DNA viruses, known and unknown.

## 50 **Importance**

51 Despite both clinical and laboratory data that show increased virulence in field isolates of MDV-  
52 1 over the last half century, we do not yet understand the genetic basis of its pathogenicity. Our  
53 knowledge of genome-wide variation between strains of this virus comes exclusively from  
54 isolates that have been cultured in the laboratory. MDV-1 isolates tend to lose virulence during  
55 repeated cycles of replication in the laboratory, raising concerns about the ability of cultured  
56 isolates to accurately reflect virus in the field. The ability to directly sequence and compare field  
57 isolates of this virus is critical to understanding the genetic basis of rising virulence in the wild.  
58 Our approaches remove the prior requirement for cell culture, and allow direct measurement of

*Pandey et al., submitted for review.*

59 viral genomic variation within and between hosts, over time, and during adaptation to changing  
60 conditions.

61

## 62 **Introduction**

63 Marek's disease virus (MDV), a large DNA alphaherpesvirus of poultry, became increasingly  
64 virulent over the second half of the 20<sup>th</sup> century, evolving from a virus that caused relatively mild  
65 disease to one that can kill all unvaccinated hosts in ten days (1–5). Today, mass immunizations  
66 with live-attenuated vaccines derived from related herpesviruses control production losses (3, 6),  
67 with almost 9 billion broiler chickens vaccinated against MD each year in the US alone (7). MD  
68 vaccines prevent host animals from developing disease symptoms, but do not prevent them from  
69 becoming infected, nor do they block transmission of the virus (6, 8). Perhaps because of that,  
70 those vaccines may have created the conditions favoring the evolutionary emergence of the  
71 hyperpathogenic strains which dominate the poultry industry today (5). Certainly, virus evolution  
72 undermined two generations of MD vaccines (1–4) However, the genetics underlying MDV-1  
73 evolution into more virulent forms and vaccine breaks are not well understood (9, 10). Likewise,  
74 the nature of the vaccine-break lesions that can result from human immunization with live-  
75 attenuated varicella zoster virus (VZV) vaccine is an area of active study (11–14).

76

77 Remarkably, our understanding of MDV-1 (also known as gallid herpesvirus type 2; GaHV-2)  
78 genomics and genetic variation comes exclusively from the study of 10 different laboratory-  
79 grown strains (15–22). Most herpesviruses share this limitation, where the large genome size and  
80 the need for high-titer samples has led to a preponderance of genome studies on cultured virus,

*Pandey et al., submitted for review.*

81 rather than clinical or field samples (23–29). Repeated observations about the loss of virulence  
82 during serial passage of MDV-1 and other herpesviruses raises concerns about the ability of  
83 cultured strains to accurately reflect the genetic basis of virulence in wild populations of virus  
84 (10, 26, 30, 31). The ability to capture and sequence viral genomes directly from host infections  
85 and sites of transmission is the necessary first step to reveal when and where variations  
86 associated with vaccine-breaks arise, which one(s) spread into future host generations, and to  
87 begin to understand the evolutionary genetics of virulence and vaccine failure.

88  
89 Recent high-throughput sequencing (HTS) applications have demonstrated that herpesvirus  
90 genomes can be captured from human clinical samples using genome amplification techniques  
91 such as oligonucleotide enrichment and PCR amplicon-based approaches (32–37). Here we  
92 present a method for the enrichment and isolation of viral genomes from dust and feather  
93 follicles, without the use of either of these solution-based enrichment methods. Chickens become  
94 infected with MDV by the inhalation of dust contaminated with virus shed from the feather  
95 follicles of infected birds. Deep sequencing of viral DNA from dust and feather follicles enabled  
96 us to observe, for the first time, the complete genome of MDV-1 directly from field samples of  
97 naturally infected hosts. This revealed variations in both new and known candidates for virulence  
98 and modulation of host immunity. These variations were detected both within and between the  
99 virus populations at different field sites, and during sequential sampling. One of the new loci  
100 potentially associated with virulence, in the viral transactivator ICP4 (MDV084), was tracked  
101 using targeted gene surveillance of longitudinal field samples. These findings confirm the  
102 genetic flexibility of this large DNA virus in a field setting, and demonstrate how a new

*Pandey et al., submitted for review.*

103 combination of HTS and targeted Sanger-based surveillance approaches can be combined to  
104 understand viral evolution in the field.

105

## 106 **Results**

### 107 **Sequencing, assembly and annotation of new MDV-1 consensus genomes from the field**

108 To assess the level of genomic diversity within and between field sites that are under real world  
109 selection, we selected two commercial-scale farms in central Pennsylvania (11 miles apart) that  
110 have a high incidence of MDV-1 (**Figure 1A**). These operations raise poultry for meat (also  
111 known as broilers), and house 25,000-30,000 individuals per house. The poultry on these farms  
112 were vaccinated with a bivalent vaccine composed of MDV-2 (strain SB-1) and HVT (strain  
113 FC126). In contrast to the Rispens vaccine, which is an attenuated MDV-1 strain, MDV-2 and  
114 HVT can be readily distinguished from MDV-1 across the length of the genome, which allowed  
115 us to distinguish wild MDV-1 from concomitant shedding of vaccine strains. These farms are  
116 part of a longitudinal study of MDV-1 epidemiology and evolution in modern agricultural  
117 settings.

118

119 To obtain material for genomic surveillance, we isolated MDV nucleocapsids from dust or  
120 epithelial tissues from individual feather follicles from selected hosts (see Methods and  
121 **Supplemental Figure S2** for overview, and **Supplemental Tables S1-S4** for DNA yields). A  
122 total of five uncultured wild-type samples of MDV were sequenced on an in-house Illumina  
123 MiSeq sequencer (**Table 1**, lines 4-6; see **Methods** for details). The sequence read data derived  
124 from dust contained approximately 2-5% MDV-1 DNA, while the feather samples ranged from

*Pandey et al., submitted for review.*

125 ~27%-48% MDV-1 (**Table 1**, line 6). Since dust represents the infectious material that transmits  
126 MDV from host to host, and across generations of animals that pass through a farm or field site,  
127 we pursued analysis of wild MDV genomes from both types of source material.

128

129 Consensus genomes were created for each of the five samples in **Table 1**, using a recently  
130 described combination of *de novo* assembly and reference-guided alignment of large sequence  
131 blocks, or contigs (38). Like other alphaherpesviruses, MDV genomes have a class E  
132 organization (**Figure 2A**) that consists of unique long (UL) and unique short (US) regions (39,  
133 40). Each unique region is flanked by inverted repeats, which are named according to their  
134 position (terminal, T, vs. internal, I), and whether they flank the unique long (L) or short (S)  
135 region (TRL, IRL, TRS, IRS; see **Figure 2A** for illustration). Nearly complete genomes were  
136 obtained for all five samples (**Table 1**). The coverage depth for each genome was directly  
137 proportional to the number of MDV-1 specific reads obtained from each sequencing library  
138 (**Table 1**, line 5,7). The dust sample from Farm B had the highest coverage depth, at an average  
139 of almost 600X across the viral genome. Feather 1 from Farm B had the lowest coverage depth,  
140 averaging 44X genome-wide, which still exceeds that of most bacterial or eukaryotic genome  
141 assemblies. The genome length for all 5 samples was approximately 180 kilobases (**Table 1**),  
142 which is comparable to all previously sequenced MDV-1 isolates (15, 17–22, 41).

143

144 For each field sample collected and analyzed here, we assembled a consensus viral genome. We  
145 anticipated that the viral DNA present in a single feather follicle might be homotypic, based on  
146 similar results found for individual vesicular lesions of the alphaherpesvirus varicella zoster virus  
147 (VZV) (11, 33). We further expected that the genomes assembled from a dust sample would

*Pandey et al., submitted for review.*

148 represent a mix of viral genomes, summed over time and space. Viral genomes assembled from  
149 dust represent the most common genome sequence, or alleles therein, from all of the circulating  
150 MDV-1 on a particular farm. The comparison of consensus genomes provided a view into the  
151 amount of sequence variation between Farm A and Farm B, or between two individuals on the  
152 same Farm (**Table 2**). In contrast, examining the polymorphic loci within each consensus  
153 genome assembly allowed us to observe the level of variation within the viral population at each  
154 point source (**Supplemental Table S5, Figures 3-4**).

155

#### 156 **DNA and amino acid variations between five new field genomes of MDV-1**

157 We began our assessment of genetic diversity by determining the extent of DNA and amino acid  
158 variations between the five different consensus genomes. We found that the five genomes are  
159 highly similar to one another at the DNA level, with the percent homology ranging from 99.4%  
160 to 99.9% in pairwise comparisons (**Figure 2C, Table 2**). These comparisons used a trimmed  
161 genome format (**Figure 2B**) where the terminal repeat regions had been removed, so that these  
162 sequences were not over-represented in the analyses. The level of identity between samples is  
163 akin to that observed in closely related isolates of HSV-1 (38). Observed nucleotide differences  
164 were categorized as genic or intergenic, and further sub-divided based on whether the differences  
165 were insertions or deletions (INDELs) or single-nucleotide polymorphism (SNPs) (**Table 2**). The  
166 number of nucleotide differences was higher in intergenic regions than in genic regions for all  
167 genomes. For the INDEL differences, we also calculated the minimum number of events that  
168 could have led to the observed differences, to provide context on the relative frequency of these  
169 loci in each genome. We anticipate that these variations include silent mutations, as well as  
170 potentially advantageous or deleterious coding differences.

*Pandey et al., submitted for review.*

171  
172 To understand the effect(s) of these nucleotide variations on protein coding and function, we  
173 next compared the amino acid (AA) sequences of all open reading frames (ORFs) for the five  
174 isolates. The consensus protein coding sequences of all five isolates were nearly identical, with  
175 just a few differences (**Table 2**). In comparison to the other four samples, Farm B-dust harbored  
176 AA substitutions in four proteins. A single non-synonymous mutation was seen in each of the  
177 following: the virulence-associated lipase homolog vLIP (MDV010; Farm B-dust, S501A) (42),  
178 the MHC class I immune evasion protein LORF2 (MDV012; Farm B-dust, L311W) (43), and the  
179 probable membrane protein UL43 (MDV056; Farm B-dust, S74L). A single synonymous  
180 mutation was observed in the DNA helicase-primase protein UL8 (MDV020). Finally, a 66 AA  
181 insertion unique to Farm B-dust was observed in the DNA polymerase processivity subunit  
182 protein UL42 (MDV055). We did not observe any coding differences between temporally  
183 separated dust isolates from Farm A or between feather isolates from different hosts in Farm B,  
184 although both of these comparisons (**Table 2**, bottom) revealed hundreds of noncoding  
185 differences. The fact that any coding differences were observed in this small sampling of field  
186 viruses suggests that the natural ecology of MDV-1 may include drift and adaptation in protein  
187 function, in addition to genetic drift.

188

### 189 **Detection of polymorphic bases within each genome**

190 Comparing viral genomes found in different sites provides a macro-level assessment of viral  
191 diversity. We next investigated the presence of polymorphic viral populations within each  
192 consensus genome, to reveal how much diversity might exist within a field site (as reflected in  
193 dust-derived genomes) or within a single host (as reflected in feather genomes). Drug resistance



*Pandey et al., submitted for review.*

194 and vaccine failure have been attributed to the variation present in viral populations (11, 33, 44).  
195 Polymorphic populations allow viruses to adapt to diverse environments and withstand changing  
196 selective pressures, such as evading the host immune system, adapting to different tissue  
197 compartments, and facilitating transmission between hosts (11, 27, 33–35, 44, 45).  
198  
199 For each consensus genome, we used polymorphism detection analysis to examine the depth and  
200 content of the sequence reads at every nucleotide position in each genome (see **Methods** for  
201 details). Rather than detecting differences between isolates, as in **Table 2**, this approach revealed  
202 polymorphic sites within the viral population that contributed to each consensus genome. We  
203 detected 2-58 polymorphic sites within each consensus genome (**Figure 3**) (see **Methods** for  
204 details). The feather genomes had a lower number of polymorphisms compared to the dust  
205 genomes, which may be due to low within-follicle diversity or the relatively low sequence  
206 coverage. INDELs were not included in this polymorphism analysis, but clearly contributed to  
207 between-sample variation (**Table 2**), suggesting that this may be an underestimate of the overall  
208 amount of within-sample variation. Viral polymorphisms were distributed across the entire  
209 length of the genome (**Figure 3**), with the majority concentrated in the repeat regions.  
210 Application of a more stringent set of parameters (see **Methods** for details) yielded a similar  
211 distribution of polymorphisms, albeit with no polymorphisms detected in feather samples due to  
212 their lower depth of coverage (**Supplemental Figure S3**). These data reveal that polymorphic  
213 alleles are present in field isolates, including in viral genomes collected from single sites of  
214 shedding in infected animals.

215

*Pandey et al., submitted for review.*

216 To address the potential effect(s) of these polymorphisms on MDV biology, we divided the  
217 observed polymorphisms into categories of synonymous, non-synonymous, genic-untranslated,  
218 or intergenic (**Supplemental Table S5**). The majority of all polymorphisms were located in  
219 intergenic regions (**Supplemental Table S5**). We next investigated whether evidence of  
220 selection could be detected from the distribution of polymorphisms in our samples. One way to  
221 assess this is to determine whether the relative frequencies of synonymous, non-synonymous,  
222 genic-untranslated, and intergenic polymorphisms can be explained by random chance. If the  
223 observed frequencies differ from those expected from a random distribution, it would suggest  
224 genetic selection. After calculating the expected distribution in each sample (as described in  
225 **Methods**), we determined that the distribution of variants differed from that expected by chance  
226 in each of our dust samples (**Figure 4**, Farm A-Dust 1:  $\chi^2=68.16$ , d.f.=3,  $p<0.001$ ; Farm A-Dust  
227 2:  $\chi^2=128.57$ , d.f.=3,  $p<0.001$ ; Farm B-Dust 1:  $\chi^2=63.42$ , d.f.=3,  $p<0.001$ ). In addition, we found  
228 in pairwise tests that the number of observed intergenic polymorphisms was significantly higher  
229 than the observed values for other categories (**Table S6**). This suggests that the mutations that  
230 occurred in the intergenic regions were better tolerated and more likely to be maintained in the  
231 genome; *i.e.* that purifying selection was acting on coding regions.

232

### 233 **Tracking shifts in polymorphic loci over time**

234 In addition to observing polymorphic SNPs in each sample at a single moment in time, we  
235 explored whether any shifts in polymorphic allele frequency were detected in the two sequential  
236 dust samples from Farm A. We found one locus in the ICP4 (MDV084) gene (nucleotide  
237 position 5,495) that was polymorphic in the Farm A-dust 2 sample, with nearly equal proportions  
238 of sequence reads supporting the major allele (C) and the minor allele (A) (**Figure 5A**). In

*Pandey et al., submitted for review.*

239 contrast, this locus had been 99% A and only 1% C in Farm A-dust 1 (collected 11 months  
240 earlier in another house on the same farm), such that it was not counted as polymorphic in that  
241 sample by our parameters (see **Methods** for details). At this polymorphic locus, the nucleotide C  
242 encodes a serine, while nucleotide A encodes a tyrosine. The encoded AA lies in the C-terminal  
243 domain of ICP4 (AA position 1,832). ICP4 is an important immediate-early protein in all  
244 herpesviruses, where it serves as a major regulator of viral transcription (46). The role of ICP4 in  
245 MDV pathogenesis is also considered crucial because of its proximity to the latency associated  
246 transcripts (LAT) and recently described miRNAs (9).

247  
248 Given the very different allele frequencies at this ICP4 locus between two houses on the same  
249 farm 11 months apart, we examined dust samples from one of the houses over 9 months with  
250 targeted Sanger sequencing of this SNP (**Figure 5B**). We found that this locus was highly  
251 polymorphic in time-separated dust samples. The A (Tyrosine) allele rose to almost 50%  
252 frequency in the 9 month period. In four of the dust samples, the A (Tyrosine) allele was  
253 dominant over the C (serine) allele. This reversible fluctuation in allele frequencies over a short  
254 period of time is unprecedented for alphaherpesviruses so far as we know. However, recent  
255 studies on human cytomegalovirus (HCMV) have shown that selection can cause viral  
256 populations to evolve in short periods of time (34, 35). While this is only one example of a  
257 polymorphic locus that shifts in frequency over time, similar approaches could be used at any of  
258 the hundreds of polymorphic loci detected here (**Supplemental Table S5**). This combination of  
259 deep-sequencing genomic approaches to detect new polymorphic loci, and fast gene-specific  
260 surveillance to track changes in SNP frequency over a larger number of samples, illustrate the

*Pandey et al., submitted for review.*

261 power of high-quality full genome sequences from field samples to provide powerful markers for  
262 field ecology.

263

#### 264 **Comparison of field isolates of MDV-1 to previously sequenced isolates**

265 To compare these new field-based MDV genomes to previously sequenced isolates of MDV, we  
266 created a multiple sequence alignment of all available MDV-1 genomes (15, 18–22, 41, 47, 48).

267 The multiple sequence alignment was used to generate a dendrogram depicting genetic  
268 relatedness (see **Methods**). We observed that the five new isolates form a separate group when  
269 compared to all previously sequenced isolates (**Figure 6**). This may result from geographic  
270 differences as previously seen for HSV-1 and VZV (28, 49–52), or from temporal differences in  
271 the time of sample isolations, or from the lack of cell-culture adaptation in these new genomes.

272

#### 273 **Assessment of taxonomic diversity in dust and chicken feathers**

274 As noted in **Table 1**, only a fraction of the reads obtained from each sequencing library were  
275 specific to MDV-1. We analyzed the remaining sequences to gain insight into the taxonomic  
276 diversity found in poultry dust and chicken feathers. Since our enrichment for viral capsids  
277 removed most host and environmental contaminants, the taxa observed here represent only a  
278 fraction of the material present initially. However it provides useful insight into the overall  
279 complexity of each sample type. The results of the classification for Farm B- dust, Farm B-  
280 feather 1, and Farm B-feather 2 are shown in **Supplemental Figure S4**. We divided the  
281 sequence reads by the different kingdoms they represent. Complete lists of taxonomic diversity  
282 for all samples to the family level are listed in **Supplemental Table S7**. As expected, the

*Pandey et al., submitted for review.*

283 taxonomic diversity of dust is greater than that of feather samples. The majority of sequences in  
284 the dust samples mapped to the chicken genome, and only about 2-5% were MDV specific (see  
285 also **Table 1**, line 6). We found that single feathers were a better source of MDV DNA, due to  
286 their reduced level of taxonomic diversity and higher percentage of MDV-specific reads (**Table**  
287 **1**, line 6 and **Supplemental Figure S4**).

288

## 289 **Discussion**

290 This study presents the first description of MDV-1 genomes sequenced directly from a field  
291 setting. This work builds on recent efforts to sequence VZV and HCMV genomes directly from  
292 human clinical samples, but importantly the approaches presented here do not employ either the  
293 oligo-enrichment used for VZV or the PCR-amplicon strategy used for HCMV (11, 33, 35, 37,  
294 53). This makes our technique widely accessible and reduces potential methodological bias. It is  
295 also more rapid to implement and is applicable to the isolation of unknown large DNA viruses,  
296 since it does not rely on sequence-specific enrichment strategies. These five genomes were  
297 interrogated at the level of comparing consensus genomes – between-host variation – as well as  
298 within each consensus genome – within-host variation. By following up with targeted PCR and  
299 Sanger sequencing, we demonstrate that HTS can rapidly empower molecular epidemiological  
300 field surveillance of loci undergoing genetic shifts.

301

302 Although a limited number of non-synonymous differences were detected between the field  
303 samples compared here, it is striking that several of these have been previously demonstrated to

*Pandey et al., submitted for review.*

304 have roles in virulence and immune evasion. The N-glycosylated protein viral lipase (vLIP;  
305 MDV010) encodes a 120 kDa protein that is required for lytic virus replication in chickens (4).  
306 The viral protein LORF2 (MDV012) is a viral immune evasion gene that suppresses MHC class  
307 I expression by inhibiting TAP transporter delivery of peptides to the endoplasmic reticulum  
308 (43). LORF2 is unique to the non-mammalian *Mardivirus* clade, but its function is analogous to  
309 that of the mammalian alphaherpesvirus product UL49.5 (43, 54, 55). The non-synonymous  
310 mutations detected in Farm B dust lie in protein residues where their impact is unknown, but the  
311 presence of these variations suggests that these targets warrant further study. Polymorphisms that  
312 were not fully penetrant in the consensus genomes, but that may be fodder for future selection,  
313 include residues in genes associated with virulence and immune evasion, such as ICP4, Meq,  
314 pp38, vLIP, LORF2, and others (**Supplemental Table S5**). It is noteworthy that these coding  
315 variations are detected despite signs of clearance of polymorphisms from coding regions, as  
316 indicated by the higher-than-expected ratios of intergenic to coding polymorphisms in these  
317 genomes (Figure 4). Together these findings suggest that MDV exhibits genetic variation and  
318 undergoes rapid selection in the field, which may provide a basis for its ability to overcome  
319 vaccine-induced host resistance to infection (4, 56–58). Future work will be needed to deduce if  
320 the mechanisms and phenotypic outcomes in wild virus reflect those predicted by prior *in vitro*  
321 evolution studies (10, 30).  
322  
323 Our comparison of new field-isolated MDV-1 genomes revealed a distinct genetic clustering of  
324 these genomes, separate from other previously sequenced MDV-1 genomes (**Figure 6**). This  
325 pattern may result from geographic and temporal drift in these strains, or from the wild, virulent  
326 nature of these strains vs. the adaptation(s) to tissue culture in all prior MDV-1 genome

*Pandey et al., submitted for review.*

327 sequences. The impact of geography on the genetic relatedness of herpesvirus genomes has been  
328 previously shown for related alphaherpesviruses such as VZV and HSV-1 (28, 49–52).  
329 Phenomena such as recombination can also have an impact on the clustering pattern of MDV  
330 isolates. It is worth noting that the genetic distance dendrogram constructed here included  
331 genomes from isolates that were collected over a 40 year span, which introduces the potential for  
332 temporal drift (15, 18–22, 41, 47, 48). Agricultural and farming practices have evolved  
333 significantly during this time, and we presume that pathogens have kept pace. To truly  
334 understand the global diversity of MDV, future studies will need to include the impacts of  
335 recombination and polymorphisms within samples, in addition to the overall consensus-genome  
336 differences reflected by static genetic distance analyses.

337

338 Prior studies have shown that when MDV is passaged for multiple generations in cell-culture, the  
339 virus accumulates a series of mutations, including several that affect virulence (30). The same is  
340 true for the betaherpesvirus HCMV (26). Extended passage *in vitro* forms the basis of vaccine  
341 attenuation strategies, as for the successful vaccine strain (vOka) of the alphaherpesvirus VZV  
342 (59). Cultured viruses can undergo bottlenecks during initial adaptation to cell culture, and they  
343 may accumulate variations and loss of function mutations by genetic drift or positive selection.  
344 The variations and mutations thus accumulated may have little relationship to virulence and the  
345 balance of variation and selection in the field. We thus anticipate that these field-isolated viral  
346 genomes more accurately reflect the genomes of wild MDV-1 that are circulating in the field.  
347 The ability to access and compare virus from virulent infections in the field will enable future  
348 analyses of vaccine-break viruses.

349

*Pandey et al., submitted for review.*

350 Our data and approaches provide powerful new tools to measure viral diversity in field settings,  
351 and to track changes in large DNA virus populations over time in hosts and ecosystems. In the  
352 case of MDV-1, targeted surveillance based on an initial genomic survey could be used to track  
353 viral spread across a geographic area, or between multiple end-users associated with a single  
354 parent corporation (**Figure 1B**). Similar approaches could be implemented for public-or animal-  
355 health programs, for instance to guide management decisions on how to limit pathogen spread  
356 and contain airborne pathogens. The ability to sequence and compare large viral genomes  
357 directly from individual hosts and field sites will allow a new level of interrogation of host-virus  
358 fitness interactions, which form the basis of host resistance to infection (**Figure 1B**). Finally, the  
359 analysis of viral genomes from single feather follicles, as from single VZV vesicles, enables our  
360 first insights into naturally-occurring within-host variation during infection and transmission  
361 (**Figure 1B**). Evidence from tissue compartmentalization studies in HCMV suggests that viral  
362 genomes differ in distinct body niches (35, 37). If the same were true for MDV-1, it is would  
363 suggest that prior studies of spleen-derived virus may not fully reflect the virus that is shed from  
364 feather-follicle epithelia and transmitted to new hosts.

365

## 366 **Materials and Methods**

### 367 **Collection of dust and feathers**

368 Dust samples were collected into 1.5 ml tubes from fan louvers. This location contains less  
369 moisture and contaminants than floor-collected samples, and represents a mixture of air-borne  
370 virus particles and feather dander. Sequential samples from Farm A (**Table 1**) were collected 11  
371 months apart, from adjacent houses on the same farm (**Figure 1A**). Samples from Farm B (**Table**



*Pandey et al., submitted for review.*

372 **1)** were collected from a single house, at a single point in time. Feathers were collected just  
373 before hosts were transported from the farms for sale, to maximize the potential for infection and  
374 high viral titer. At the time of collection the animals were 10-12 weeks old. Ten individuals were  
375 chosen randomly throughout the entirety of one house for feather collection. Two feathers from  
376 each animal were collected from the axillary track (breast feathers). The distal 0.5-1.0 cm  
377 proximal shaft or feather tip, which contains the feather pulp, was snipped into a sterile 1.5 ml  
378 micro-tube containing a single sterile 5 mm steel bead (Qiagen). On return to the laboratory,  
379 tubes were stored at -80°C until processing. One feather from each animal was tested for the  
380 presence and quantity and MDV-1 present (see below for quantitative PCR details). The  
381 remaining feather from the two animals with highest apparent MDV-1 titer were used for a more  
382 thorough DNA extraction (see below for details) and next-generation sequencing. Animal  
383 procedures were approved by the Institutional Animal Care and Use Committee of the  
384 Pennsylvania State University (IACUC Protocol#: 46599).

385

### 386 **Viral DNA isolation from dust**

387 MDV nucleocapsids were isolated from dust as indicated in **Supplemental Figure S2A**. Dust  
388 collected from poultry houses was stored in 50 ml polypropylene Falcon<sup>®</sup> tubes (Corning) at 4°C  
389 until required. 500 mg of dust was suspended in 6.5 ml of 1X phosphate buffered saline (PBS).  
390 The mixture was vortexed vigorously until homogenous and centrifuged at 2000 × g for 10  
391 minutes. This supernatant was agitated on ice for 30 sec. using a Sonica Ultrasonic Processor  
392 Q125 (probe sonicator with 1/8<sup>th</sup> inch microtip) set to 20% amplitude. It was then vortexed  
393 before being centrifuged for a further 10 minutes at 2000 × g. These steps in the isolation of  
394 capsids from the dust were important for the release of cell-associated virus into the supernatant.

*Pandey et al., submitted for review.*

395 Vortexing distributed the dust into solution and aided in the release of virions from the cells.  
396 Centrifugation allowed large dust particles to sediment out, leaving a portion of virus in solution.  
397 Sonication of the resulting supernatant further aided in release of virus. A second round of  
398 centrifugation removed additional particulates from the supernatant. To enrich viral capsids away  
399 from the remaining contaminants, we then utilized a series of filtration techniques. The  
400 supernatant (approximately 5 ml in volume) was introduced to a 5 ml syringe and pushed  
401 through a Corning<sup>®</sup> surfactant-free cellulose acetate (SFCA) filter (0.8  $\mu\text{M}$ ) that had been soaked  
402 overnight in fetal bovine serum (FBS), which filtered out dust particles, host cells and bacteria.  
403 The flow-through was then passed through a Millipore Express<sup>®</sup> PLUS Membrane vacuum filter  
404 (0.22  $\mu\text{M}$ ) and the membrane subsequently washed twice with 2.5 ml of PBS, to remove  
405 additional bacteria and fungal spores. The resulting flow-through (approximately 10 ml in  
406 volume) was treated with DNase (Sigma) at a concentration of 0.1 mg/ml for 30 minutes at room  
407 temperature to remove contaminant DNA. In the absence of DNase treatment we observed a  
408 higher yield of viral DNA, but with much lower purity (data not shown). The MDV  
409 nucleocapsids present in the DNase-treated solution were captured on a polyethersulfone (PES)  
410 membrane (VWR) filter (0.1  $\mu\text{M}$ ). This filter membrane trapped the viral nucleocapsids, which  
411 are between 0.1-0.2  $\mu\text{m}$  (60). An increased MDV purity, but ultimately reduced total nanograms  
412 of DNA yield, may be achieved by washing this membrane once with 2.5 ml PBS (see  
413 **Supplemental Tables S1-S3**). In the future, samples with a higher percentage of MDV DNA  
414 could be obtained by applying these wash steps to all components of the sample pool. The  
415 membrane was then carefully excised using a sterile needle and forceps, and laid – exit side  
416 downwards – in a sterile 5 cm diameter plastic petri-dish where it was folded twice lengthwise.  
417 The “rolled” membrane was then placed into a 2 ml micro-tube containing 1.8 ml of lysis

*Pandey et al., submitted for review.*

418 solution (ATL buffer and Proteinase K from the DNeasy<sup>®</sup> Blood and Tissue kit, Qiagen).  
419 Digestion was allowed to proceed at 56°C for 1 hour on an incubating microplate shaker (VWR)  
420 set to 1100 rpm. The membrane was then removed, held vertically over a tilted sterile 5 cm  
421 diameter plastic petri-dish and washed with a small volume of the lysis solution (from the 2 ml  
422 micro-tube). This wash was subsequently returned to the 2 ml micro-tube and the tube replaced  
423 on the heated shaker where it was allowed to incubate overnight. The following day, the DNA  
424 was isolated as per manufacturer's instructions using the DNeasy<sup>®</sup> Blood and Tissue kit  
425 (Qiagen). DNA was eluted in 200 µl DNase-free water. Ten to fourteen aliquots of 500 mg each  
426 were used to obtain sufficient DNA for each dust sample (see **Supplemental Tables S1-S3**).  
427 Quantitative PCR was used to assess the copy number of viral genomes in the resulting DNA.  
428 Total yield and percent MDV-1 vs. MDV-2 DNA are listed in **Supplemental Tables S1-S3**.

429

#### 430 **Isolation of viral DNA from feather follicles**

431 The protocol for extraction of MDV DNA from feather follicles was optimized for the smaller  
432 input material and an expectation of higher purity (**Supplemental Figure S2B**). Sequential size  
433 filters were not used to filter out contaminants from feather follicles, since these direct host  
434 samples have fewer impurities than the environmental samples of dust. However, the feather  
435 follicle cells were encased inside the keratinaceous shell of the feather tip, which required  
436 disruption to release the cells. Each tube containing a single feather tip and one sterile 5 mm  
437 diameter steel bead was allowed to thaw, and then 200 µl of PBS was added and the sample  
438 bead-beaten for 30 seconds at 30 Hz using a TissueLyser (Qiagen) (**Supplemental Figure S2B**).  
439 Vigorous bead-beating achieved the desired destruction of the follicle tip. A further 720 µl of  
440 PBS and 80 µl of 2.5 mg/ml trypsin (Sigma) were then added (final trypsin concentration: 0.8

*Pandey et al., submitted for review.*

441 mg/ml), and the solution was transferred to a new sterile 2 ml micro-tube. Feather follicle cells  
442 were digested with trypsin to remove the extracellular matrix and to dissociate cells. Digestion  
443 was allowed to proceed for 2 hours at 37°C on an incubating microplate shaker (VWR) set to  
444 700 rpm. To release cell-associated virus, the suspension was then sonicated on ice for 30  
445 seconds using a Sonica Ultrasonic Processor Q125 (probe sonicator with 1/8<sup>th</sup> inch microtip) set  
446 to 50% amplitude. DNase I was added to a final concentration of 0.1 mg/ml and allowed to  
447 digest for 1 hour at room temperature to remove non-encapsidated DNA. An equal volume of  
448 lysis solution (ATL buffer and Proteinase K from the DNeasy<sup>®</sup> Blood and Tissue kit, Qiagen)  
449 was added and the sample was incubated over night at 56°C on an Incubating Microplate Shaker  
450 (VWR) set to 1100 rpm. The following day, the DNA was isolated as per manufacturer's  
451 instructions using the DNeasy<sup>®</sup> Blood and Tissue kit (Qiagen). While the overall amount of  
452 DNA obtained from feather follicles was lower than that obtained from pooled dust samples  
453 (**Supplemental Table S4**), it was of higher purity and was sufficient to generate libraries for  
454 sequencing (**Table 1**, lines 1-3).

455

#### 456 **Measurement of total DNA and quantification of viral DNA**

457 The total amount of DNA present in the samples was quantified by fluorescence analysis using a  
458 Qubit<sup>®</sup> fluorescence assay (Invitrogen) following the manufacturer's recommended protocol.  
459 MDV genome copy numbers were determined using serotype-specific quantitative PCR (qPCR)  
460 primers and probes, targeting either the MDV-1 pp38 (MDV073; previously known as  
461 LORF14a) gene or MDV-2 (SB-1 strain) DNA polymerase (UL42, MDV055) gene. The MDV-1  
462 assay was designed by Sue Baigent: forward primer (Spp38for) 5'-  
463 GAGCTAACCGGAGAGGGAGA-3'; reverse primer (Spp38rev) 5'-

*Pandey et al., submitted for review.*

464 CGCATAACCGACTTTCGTCAA-3'; probe (MDV-1) 6FAM-CCCACTGTGACAGCC-BHQ1  
465 (S. Baigent, *pers. comm.*). The MDV-2 assay is that of Islam et al. (61), but with a shorter MGB  
466 probe (6FAM-GTAATGCACCCGTGAC-MGB) in place of their BHQ-2 probe. Real-time  
467 quantitative PCRs were performed on an ABI Prism 7500 Fast System with an initial  
468 denaturation of 95°C for 20 seconds followed by 40 cycles of denaturation at 95°C for 3 seconds  
469 and annealing and extension at 60°C for 30 seconds. Both assays included 4 µl of DNA in a total  
470 PCR reaction volume of 20 µl with 1X PerfeCTa™ qPCR FastMix™ (Quanta Biosciences),  
471 forward and reverse primers at 300 nM and TaqMan® BHQ (MDV-1) or MGB (MDV-2)  
472 probes (Sigma and Life Sciences, respectively) at 100 nM and 200 nM, respectively. In addition  
473 each qPCR reaction incorporated 2 µl BSA (Sigma). Absolute quantification of genomes was  
474 based on a standard curve of serially diluted plasmids cloned from the respective target genes.  
475 The absolute quantification obtained was then converted to concentration. Once the  
476 concentration of the total DNA, MDV-1, and MDV-2 DNA present in the sample were known,  
477 we calculated the percentage of MDV-1 and MDV-2 genomic DNA in the total DNA pool (see  
478 **Supplemental Tables S1-S4**).

479

#### 480 **Illumina next-generation sequencing**

481 Sequencing libraries for each of the isolates were prepared using the Illumina TruSeq Nano DNA  
482 Sample Prep Kit, according to the manufacturer's recommended protocol for sequencing of  
483 genomic DNA. Genomic DNA inputs used for each sample are listed in **Table 1**. The DNA  
484 fragment size selected for library construction was 550 base pairs (bp). All the samples were  
485 sequenced on an in-house Illumina MiSeq using version 3 sequencing chemistry to obtain

Pandey et al., submitted for review.

486 paired-end sequences of 300 × 300 bp. Base calling and image analysis was performed with the  
487 MiSeq Control Software (MCS) version 2.3.0.

488

#### 489 **Consensus genome assembly**

490 As our samples contained DNA from many more organisms than just MDV, we developed a  
491 computational workflow (**Supplemental Figure S2**) to preprocess our data prior to assembly. A  
492 local BLAST database was created from every *Gallid herpesvirus* genome available in GenBank.  
493 All sequence reads for each sample were then compared to this database using BLASTN (62)  
494 with a loose e-value less than or equal to  $10^{-2}$  in order to computationally enrich for sequences  
495 related to MDV. These “MDV-like” reads were then processed for downstream genome  
496 assembly. The use of bivalent vaccine made it possible for us to readily distinguish sequence  
497 reads that resulted from the shedding of virulent MDV-1 vs. vaccine virus (MDV-2 or HVT)  
498 strains. The overall DNA identity of MDV-1 and MDV-2 is just 61% (63). In a comparison of  
499 strains MDV-1 Md5 (NC\_002229) and MDV-2 SB-1 (HQ840738), we found no spans of  
500 identical DNA greater than 50 bp (data not shown). This allowed us to accurately distinguish  
501 these 300 x 300 bp MiSeq sequence reads as being derived from either MDV-1 or MDV-2.

502

503 MDV genomes were assembled using the viral genome assembly VirGA (38) workflow which  
504 combines quality control preprocessing of reads, *de novo* assembly, genome linearization and  
505 annotation, and post-assembly quality assessments. For the reference-guided portion of viral  
506 genome assembly in VirGA, the *Gallid herpesvirus 2* (MDV-1) strain MD5 was used (GenBank  
507 Accession: NC\_002229.3). These new genomes were named according to recent  
508 recommendations, as outlined by Kuhn et al (64). We use shortened forms of these names

*Pandey et al., submitted for review.*

509 throughout the manuscript (see Table 1 for short names). The full names for all five genomes are  
510 as follows: MDV-1 *Gallus domesticus*-wt/Pennsylvania, USA/2015/Farm A-dust 1; MDV-1  
511 *Gallus domesticus*-wt/Pennsylvania, USA/2015/Farm A-dust 2; MDV-1 *Gallus domesticus*-  
512 wt/Pennsylvania, USA/2015/Farm B-dust; MDV-1 *Gallus domesticus*-wt/Pennsylvania,  
513 USA/2015/Farm B-feather 1; MDV-1 *Gallus domesticus*-wt/Pennsylvania, USA/2015/Farm B-  
514 feather 2. GenBank Accessions are listed below and in Table 1. Annotated copies of each  
515 genome, in a format compatible with genome- and sequence browsers, are available at the  
516 Pennsylvania State University ScholarSphere data repository:  
517 <https://scholarsphere.psu.edu/collections/1544bp14j>.

518

#### 519 **Between-sample: consensus genome comparisons**

520 Clustalw2 (43) was used to construct pairwise global nucleotide alignments between whole  
521 genome sequences, and pairwise global amino acid alignments between open reading frames.  
522 These alignments were utilized by downstream custom Python scripts to calculate percent  
523 identity, protein differences, and variation between samples.

524

525 The proline-rich region of UL36 (MDV049), which contains an extended array of tandem  
526 repeats, was removed from all five consensus genomes prior to comparison. The amount of  
527 polymorphism seen in this region of UL36 is driven by fluctuations in the length of these tandem  
528 repeats, as has been seen in prior studies with other alphaherpesviruses such as HSV, VZV, and  
529 pseudorabies virus (PRV) (32,48–50). Since the length of extended arrays of perfect repeats  
530 cannot be precisely determined by *de novo* assembly (23, 24, 27, 28), we excluded this region  
531 from pairwise comparisons of genome-wide variation. Genome alignments with and without the

*Pandey et al., submitted for review.*

532 UL36 region removed are archived at the ScholarSphere site:

533 <https://scholarsphere.psu.edu/collections/1544bp14j>.

534

### 535 **Within-sample: polymorphism detection within each consensus genome**

536 VarScan v2.2.11 (67) was used to detect variants present within each consensus genome. To aid  
537 in differentiating true variants from potential sequencing errors (68), two separate variant calling  
538 analyses were explored. (11). Our main polymorphism-detection parameters (used in **Figures 3-**  
539 **4** and **Supplemental Tables S5-S6**) were as follows: minimum variant allele frequency  $\geq 0.02$ ;  
540 base call quality  $\geq 20$ ; read depth at the position  $\geq 10$ ; independent reads supporting minor allele  
541  $\geq 2$ . Directional strand bias  $\geq 90\%$  was excluded; a minimum of two reads in opposing directions  
542 was required. For comparison and added stringency, we also explored a second set of parameters  
543 (used in **Supplemental Figure S3**): minimum variant allele frequency  $\geq 0.05$ ; base call quality  $\geq$   
544 20; read depth at the position  $\geq 100$ ; independent reads supporting minor allele  $\geq 5$ . Directional  
545 strand bias  $\geq 80\%$  was excluded. The variants obtained from VarScan were then mapped back to  
546 the genome to understand their distribution and mutational impact using SnpEff and SnpSift (69,  
547 70). Polymorphisms in the proline-rich region of UL36 were excluded, as noted above.

548

### 549 **Testing for signs of selection acting on polymorphic viral populations**

550 For each of our five consensus genomes, which each represent a viral population, we classified  
551 the polymorphisms detected into categories of synonymous, non-synonymous, genic-  
552 untranslated, or intergenic, based on where each polymorphism was positioned in the genome.  
553 For these analyses (**Figure 4**), we were only able to include polymorphisms detected in the three



*Pandey et al., submitted for review.*

554 dust genomes, since the total number of polymorphisms obtained from feather genomes was too  
555 low for chi-square analysis. First, we calculated the total possible number of single nucleotide  
556 mutations that could be categorized as synonymous, non-synonymous, genic-untranslated or  
557 intergenic. To remove ambiguity when mutations in overlapping genes could be classified as  
558 either synonymous or non-synonymous, genes with alternative splice variants or overlapping  
559 reading frames were excluded from these analyses. This removed 25 open reading frames  
560 (approximately 21% of the genome). These tallies of potential mutational events were used to  
561 calculate the expected fraction of mutations in each category. We performed chi-squared tests on  
562 each dataset to assess whether the observed distribution of polymorphisms matched the expected  
563 distribution. We also performed a similar analysis in pairwise fashion (**Supplemental Table S6**),  
564 to assess whether the fraction of variants differed from what would be expected by random  
565 chance. Pairwise combinations included the following: synonymous vs. non-synonymous,  
566 synonymous vs. intergenic, synonymous vs. genic-untranslated, non-synonymous vs. intergenic,  
567 non-synonymous vs. genic-untranslated, and intergenic vs. genic-untranslated. Statistically  
568 significant outcomes would suggest that recent or historical selection differed between those  
569 categories of variants.

570

#### 571 **Sanger sequencing of polymorphic locus in ICP4**

572 A potential locus of active selection within the ICP4 (MDV084) gene was detected during deep-  
573 sequencing of Farm B-dust. This locus was examined using Sanger sequencing. An  
574 approximately 400 bp region of the ICP4 gene was amplified using a Taq PCR Core Kit  
575 (Qiagen) and the following primers at 200 nM: forward primer (ICP4selF)  
576 5' AACACCTCTTGCCATGGTTC 3'; reverse primer (ICP4selR)

*Pandey et al., submitted for review.*

577 5'GGACCAATCATCCTCTCTGG 3'. Cycling conditions included an initial denaturation of  
578 95°C for 2 minutes, followed by 40 cycles of denaturation at 95°C for 30 seconds, annealing at  
579 55°C for 30 seconds and extension at 72°C for 1 minute, with a terminal extension at 72°C for 10  
580 minutes. The total reaction volume of 50 µl included 10 µl of DNA and 4 µl BSA (final  
581 concentration 0.8 mg/ml). Amplification products were visualized on a 1.5% agarose gel, the  
582 target amplicon excised and then purified using the E.Z.N.A. Gel Extraction Kit (Omega Bio-  
583 tek). Sanger sequencing was performed by the Penn State Genomics Core Facility utilizing the  
584 same primers as used for DNA amplification. The relative peak height of each base call at the  
585 polymorphic position was analyzed using the ab1PeakReporter tool (71).

586

#### 587 **Genetic distance and dendrogram**

588 Multiple sequence alignments of complete MDV-1 (*Gallid herpesvirus 2*) genomes from  
589 GenBank (15, 18–22, 41, 47, 48) and those assembled by our lab were generated using MAFFT  
590 (72). The evolutionary distances were computed using the Jukes-Cantor method (73) and the  
591 evolutionary history was inferred using the neighbor-joining method (74) in MEGA6 (75), with  
592 1,000 bootstrap replicates (76). Positions containing gaps and missing data were excluded. The  
593 18-strain genome alignment is archived at ScholarSphere:

594 <https://scholarsphere.psu.edu/collections/1544bp14j>.

595

#### 596 **Taxonomic estimation of non-MDV sequences in dust and feathers**

597 All sequence reads from each sample were submitted to a quality control preprocessing method  
598 to remove sequencing primers, artifacts, and areas of low confidence (38). Sequence annotation

*Pandey et al., submitted for review.*

599 was performed using a massively iterative all-vs.-all BLASTN (E-value  $\leq 10^{-2}$ ) approach using  
600 the all-nucleotide-database from NCBI. Only a portion of the total sequence read pool could be  
601 identified with confidence using this method. We then used *de novo* assembly to extend the  
602 length of these unidentified sequences, therefore elongating them into contigs. These were  
603 iterated through BLASTN again, which revealed alignment to repetitive regions of the *Gallus*  
604 *domesticus* (chicken) genome. Since the viral DNA enrichment procedures include a level of  
605 stochasticity in removal of host and environmental contaminants, the proportion of taxa present  
606 is not a definitive outline of those present initially. The results of these classifications are shown  
607 in **Supplemental Figure S4** and listed in **Supplemental Table S7**.

608

#### 609 **GenBank accession numbers and availability of materials**

610 GenBank Accessions are listed here and in Table 1: Farm A - dust 1, KU173116; Farm A - dust  
611 2, KU173115; Farm B – dust, KU173119; Farm B - feather 1, KU173117; Farm B - feather 2,  
612 KU173118. Additional files used in this manuscript, such as multiple-sequence alignments of  
613 these genomes, are archived and available at ScholarSphere:

614 <https://scholarsphere.psu.edu/collections/1544bp14j>

615

#### 616 **Acknowledgements**

617 We thank Michael DeGiorgio, Peter Kerr, Sue Baigent, and members of Szpara and Read labs  
618 for helpful feedback and discussion. This work was supported and inspired by the Center for  
619 Infectious Disease Dynamics and the Huck Institutes for the Life Sciences at the Pennsylvania  
620 State University.

*Pandey et al., submitted for review.*

621

## 622 References

- 623 1. **Biggs PM.** 2004. Marek's disease: Long and difficult beginnings, p. 8–16. *In* Davison, F,  
624 Nair, V (eds.), Marek's Disease. Academic Press, Oxford.
- 625 2. **Witter RL.** 1997. Increased virulence of Marek's disease virus field isolates. *Avian Dis*  
626 **41**:149–163.
- 627 3. **Gimeno IM.** 2008. Marek's disease vaccines: a solution for today but a worry for  
628 tomorrow? *Vaccine* **26 Suppl 3**:C31–41.
- 629 4. **Osterrieder N, Kamil JP, Schumacher D, Tischer BK, Trapp S.** 2006. Marek's disease  
630 virus: from miasma to model. *Nat Rev Microbiol* **4**:283–294.
- 631 5. **Read AF, Baigent SJ, Powers C, Kgosana LB, Blackwell L, Smith LP, Kennedy DA,**  
632 **Walkden-Brown SW, Nair VK.** 2015. Imperfect Vaccination Can Enhance the  
633 Transmission of Highly Virulent Pathogens. *PLoS Biol* **13**.
- 634 6. **Witter RL, Lee LF.** 1984. Polyvalent Marek's disease vaccines: Safety, efficacy and  
635 protective synergism in chickens with maternal antibodies. *Avian Pathol* **13**:75–92.
- 636 7. Poultry Slaughter Annual Summary. U S Dep Agric Econ Stat Mark Inf Syst. Government  
637 data.
- 638 8. **Islam AFMF, Walkden-Brown SW, Groves PJ, Underwood GJ.** 2008. Kinetics of  
639 Marek's disease virus (MDV) infection in broiler chickens 1: effect of varying vaccination  
640 to challenge interval on vaccinal protection and load of MDV and herpesvirus of turkey in  
641 the spleen and feather dander over time. *Avian Pathol* **37**:225–235.
- 642 9. **Nair V.** 2013. Latency and Tumorigenesis in Marek's Disease. *Avian Dis* **57**:360–365.
- 643 10. **Hildebrandt E, Dunn JR, Perumbakkam S, Niikura M, Cheng HH.** 2014.  
644 Characterizing the molecular basis of attenuation of Marek's disease virus via in vitro serial  
645 passage identifies de novo mutations in the helicase-primase subunit gene UL5 and other  
646 candidates associated with reduced virulence. *J Virol* **88**:6232–42.
- 647 11. **Depledge DP, Kundu S, Jensen NJ, Gray ER, Jones M, Steinberg S, Gershon A,**  
648 **Kinchington PR, Schmid DS, Balloux F, Nichols RA, Breuer J.** 2014. Deep Sequencing  
649 of Viral Genomes Provides Insight into the Evolution and Pathogenesis of Varicella Zoster  
650 Virus and Its Vaccine in Humans. *Mol Biol Evol* **31**:397–409.
- 651 12. **Quinlivan M, Breuer J.** 2014. Clinical and molecular aspects of the live attenuated Oka  
652 varicella vaccine: Studies of the Oka varicella vaccine. *Rev Med Virol* **24**:254–273.
- 653 13. **Weinert LA, Depledge DP, Kundu S, Gershon AA, Nichols RA, Balloux F, Welch JJ,**  
654 **Breuer J.** 2015. Rates of Vaccine Evolution Show Strong Effects of Latency: Implications  
655 for Varicella Zoster Virus Epidemiology. *Mol Biol Evol* **32**:1020–1028.

*Pandey et al., submitted for review.*

- 656 14. **Zerboni L, Sen N, Oliver SL, Arvin AM.** 2014. Molecular mechanisms of varicella zoster  
657 virus pathogenesis. *Nat Rev Microbiol* **12**:197–210.
- 658 15. **Tulman ER, Afonso CL, Lu Z, Zsak L, Rock DL, Kutish GF.** 2000. The Genome of a  
659 Very Virulent Marek's Disease Virus. *J Virol* **74**:7980–7988.
- 660 16. **Niikura M, Dodgson J, Cheng H.** 2006. Direct evidence of host genome acquisition by the  
661 alphaherpesvirus Marek's disease virus. *Arch Virol* **151**:537–549.
- 662 17. **Spatz SJ, Silva RF.** 2007. Sequence determination of variable regions within the genomes  
663 of gallid herpesvirus-2 pathotypes. *Arch Virol* **152**:1665–1678.
- 664 18. **Spatz SJ, Zhao Y, Petherbridge L, Smith LP, Baigent SJ, Nair V.** 2007. Comparative  
665 sequence analysis of a highly oncogenic but horizontal spread-defective clone of Marek's  
666 disease virus. *Virus Genes* **35**:753–766.
- 667 19. **Zhang F, Liu C-J, Zhang Y-P, Li Z-J, Liu A-L, Yan F-H, Cong F, Cheng Y.** 2011.  
668 Comparative full-length sequence analysis of Marek's disease virus vaccine strain 814.  
669 *Arch Virol* **157**:177–183.
- 670 20. **Cheng Y, Cong F, Zhang Y, Li Z, Xu N, Hou G, Liu C.** 2012. Genome sequence  
671 determination and analysis of a Chinese virulent strain, LMS, of Gallid herpesvirus type 2.  
672 *Virus Genes* **45**:56–62.
- 673 21. **Spatz SJ, Volkening JD, Gimeno IM, Heidari M, Witter RL.** 2012. Dynamic  
674 equilibrium of Marek's disease genomes during in vitro serial passage. *Virus Genes*  
675 **45**:526–536.
- 676 22. **Su S, Cui N, Cui Z, Zhao P, Li Y, Ding J, Dong X.** 2012. Complete Genome Sequence of  
677 a Recombinant Marek's Disease Virus Field Strain with One Reticuloendotheliosis Virus  
678 Long Terminal Repeat Insert. *J Virol* **86**:13818–13819.
- 679 23. **Peters G a, Tyler SD, Grose C, Severini A, Gray MJ, Upton C, Tipples G a.** 2006. A  
680 full-genome phylogenetic analysis of varicella-zoster virus reveals a novel origin of  
681 replication-based genotyping scheme and evidence of recombination between major  
682 circulating clades. *J Virol* **80**:9850–9860.
- 683 24. **Tyler SD, Peters GA, Grose C, Severini A, Gray MJ, Upton C, Tipples GA.** 2007.  
684 Genomic cartography of varicella-zoster virus: a complete genome-based analysis of strain  
685 variability with implications for attenuation and phenotypic differences. *Virology* **359**:447–  
686 58.
- 687 25. **Bradley AJ, Lurain NS, Ghazal P, Trivedi U, Cunningham C, Baluchova K, Gatherer  
688 D, Wilkinson GWG, Dargan DJ, Davison AJ.** 2009. High-throughput sequence analysis  
689 of variants of human cytomegalovirus strains Towne and AD169. *J Gen Virol* **90**:2375–80.
- 690 26. **Dargan DJ, Douglas E, Cunningham C, Jamieson F, Stanton RJ, Baluchova K,  
691 McSharry BP, Tomasec P, Emery VC, Percivalle E, Sarasini A, Gerna G, Wilkinson**

*Pandey et al., submitted for review.*

- 692 **GWG, Davison AJ.** 2010. Sequential mutations associated with adaptation of human  
693 cytomegalovirus to growth in cell culture. *J Gen Virol* **91**:1535–46.
- 694 27. **Szpara ML, Tafuri YR, Parsons L, Shamim SR, Verstrepen KJ, Legendre M, Enquist**  
695 **LW.** 2011. A wide extent of inter-strain diversity in virulent and vaccine strains of  
696 alphaherpesviruses. *PLoS Pathog* **7**:1–23.
- 697 28. **Szpara ML, Gatherer D, Ochoa A, Greenbaum B, Dolan A, Bowden RJ, Enquist LW,**  
698 **Legendre M, Davison AJ.** 2014. Evolution and diversity in human herpes simplex virus  
699 genomes. *J Virol* **88**:1209–27.
- 700 29. **Newman RM, Lamers SL, Weiner B, Ray SC, Colgrove RC, Diaz F, Jing L, Wang K,**  
701 **Saif S, Young S, Henn M, Laeyendecker O, Tobian AAR, Cohen JI, Koelle DM,**  
702 **Quinn TC, Knipe DM.** 2015. Genome Sequencing and Analysis of Geographically  
703 Diverse Clinical Isolates of Herpes Simplex Virus 2. *J Virol JVI.01303–15.*
- 704 30. **Spatz SJ.** 2010. Accumulation of attenuating mutations in varying proportions within a  
705 high passage very virulent plus strain of Gallid herpesvirus type 2. *Virus Res* **149**:135–142.
- 706 31. **Dix RD, McKendall RR, Baringer JR.** 1983. Comparative neurovirulence of herpes  
707 simplex virus type 1 strains after peripheral or intracerebral inoculation of BALB/c mice.  
708 *Infect Immun* **40**:103–112.
- 709 32. **Cunningham C, Gatherer D, Hilfrich B, Baluchova K, Derrick J, Thomson M,**  
710 **Griffiths PD, Wilkinson GWG, Schulz TF, Dargan DJ, Davison AJ.** 2010. Sequences of  
711 complete human cytomegalovirus genomes from infected cell cultures and clinical  
712 specimens. *J Gen Virol* **91**:605–15.
- 713 33. **Depledge DP, Palser AL, Watson SJ, Lai IY-C, Gray ER, Grant P, Kanda RK,**  
714 **Leproust E, Kellam P, Breuer J.** 2011. Specific capture and whole-genome sequencing of  
715 viruses from clinical samples. *PloS One* **6**:1–7.
- 716 34. **Renzette N, Bhattacharjee B, Jensen JD, Gibson L, Kowalik TF.** 2011. Extensive  
717 genome-wide variability of human cytomegalovirus in congenitally infected infants. *PLoS*  
718 *Pathog* **7**:e1001344.
- 719 35. **Renzette N, Gibson L, Bhattacharjee B, Fisher D, Schleiss MR, Jensen JD, Kowalik**  
720 **TF.** 2013. Rapid intrahost evolution of human cytomegalovirus is shaped by demography  
721 and positive selection. *PLoS Genet* **9**:e1003735.
- 722 36. **Lei H, Li T, Hung G-C, Li B, Tsai S, Lo S-C.** 2013. Identification and characterization of  
723 EBV genomes in spontaneously immortalized human peripheral blood B lymphocytes by  
724 NGS technology. *BMC Genomics* **14**:804.
- 725 37. **Renzette N, Pokalyuk C, Gibson L, Bhattacharjee B, Schleiss MR, Hamprecht K,**  
726 **Yamamoto AY, Mussi-Pinhata MM, Britt WJ, Jensen JD, Kowalik TF.** 2015. Limits  
727 and patterns of cytomegalovirus genomic diversity in humans. *Proc Natl Acad Sci*  
728 **201501880.**

*Pandey et al., submitted for review.*

- 729 38. **Parsons LR, Tafuri YR, Shreve JT, Bowen CD, Shipley MM, Enquist LW, Szpara**  
730 **ML.** 2015. Rapid genome assembly and comparison decode intrastrain variation in human  
731 alphaherpesviruses. *mBio* **6**.
- 732 39. **Knipe DM, Howley P.** 2013. *Fields Virology*. Lippincott Williams & Wilkins.
- 733 40. **Osterrieder K, Vautherot J-F.** 2004. 3 - The genome content of Marek's disease-like  
734 viruses, p. 17–31. *In* Davison, F, Nair, V (eds.), *Marek's Disease*. Academic Press, Oxford.
- 735 41. **Niikura M, Dodgson J, Cheng H.** 2005. Direct evidence of host genome acquisition by the  
736 alphaherpesvirus Marek's disease virus. *Arch Virol* **151**:537–549.
- 737 42. **Kamil JP, Tischer BK, Trapp S, Nair VK, Osterrieder N, Kung H-J.** 2005. vLIP, a  
738 Viral Lipase Homologue, Is a Virulence Factor of Marek's Disease Virus. *J Virol* **79**:6984–  
739 6996.
- 740 43. **Hearn C, Preeyanon L, Hunt HD, York IA.** 2015. An MHC class I immune evasion gene  
741 of Marek's disease virus. *Virology* **475**:88–95.
- 742 44. **Domingo E, Martín V, Perales C, Grande-Pérez A, García-Arriaza J, Arias A.** 2006.  
743 Viruses as Quasispecies: Biological Implications, p. 51–82. *In* Domingo, E (ed.),  
744 Quasispecies: Concept and Implications for Virology. Springer Berlin Heidelberg.
- 745 45. **Holland J, Spindler K, Horodyski F, Grabau E, Nichol S, VandePol S.** 1982. Rapid  
746 evolution of RNA genomes. *Science* **215**:1577–1585.
- 747 46. **Xie Q, Anderson AS, Morgan RW.** 1996. Marek's disease virus (MDV) ICP4, pp38, and  
748 meq genes are involved in the maintenance of transformation of MDCC-MSB1 MDV-  
749 transformed lymphoblastoid cells. *J Virol* **70**:1125–1131.
- 750 47. **Spatz SJ, Rue CA.** 2008. Sequence determination of a mildly virulent strain (CU-2) of  
751 Gallid herpesvirus type 2 using 454 pyrosequencing. *Virus Genes* **36**:479–489.
- 752 48. **Spatz SJ, Petherbridge L, Zhao Y, Nair V.** 2007. Comparative full-length sequence  
753 analysis of oncogenic and vaccine (Rispens) strains of Marek's disease virus. *J Gen Virol*  
754 **88**:1080–1096.
- 755 49. **Norberg P, Tyler S, Severini A, Whitley R, Liljeqvist J-A, Bergstrom T.** 2011. A  
756 genome-wide comparative evolutionary analysis of herpes simplex virus type 1 and  
757 varicella zoster virus. *PloS One* **6**:1–8.
- 758 50. **Grose C.** 2012. Pangaea and the Out-of-Africa Model of Varicella-Zoster Virus Evolution  
759 and Phylogeography. *J Virol* **86**:9558–9565.
- 760 51. **Kolb AW, Ané C, Brandt CR.** 2013. Using HSV-1 genome phylogenetics to track past  
761 human migrations. *PloS One* **8**:1–9.



*Pandey et al., submitted for review.*

- 762 52. **Chow VT, Tipples GA, Grose C.** 2013. Bioinformatics of varicella-zoster virus: single  
763 nucleotide polymorphisms define clades and attenuated vaccine genotypes. *Infect Genet*  
764 *Evol J Mol Epidemiol Evol Genet Infect Dis* **18**:351–356.
- 765 53. **Renzette N, Bhattacharjee B, Jensen JD, Gibson L, Kowalik TF.** 2011. Extensive  
766 genome-wide variability of human cytomegalovirus in congenitally infected infants. *PLoS*  
767 *Pathog* **7**:1–14.
- 768 54. **Koppers-Lalic D, Verweij MC, Lipińska AD, Wang Y, Quinten E, Reits EA, Koch J,**  
769 **Loch S, Rezende MM, Daus F, Bieńkowska-Szewczyk K, Osterrieder N, Mettenleiter**  
770 **TC, Heemskerk MHM, Tampé R, Neefjes JJ, Chowdhury SI, Rensing ME, Rijsewijk**  
771 **FAM, Wiertz EJHJ.** 2008. Varicellovirus UL49.5 Proteins Differentially Affect the  
772 Function of the Transporter Associated with Antigen Processing, TAP. *PLoS Pathog*  
773 **4**:e1000080.
- 774 55. **Verweij MC, Lipinska AD, Koppers-Lalic D, van Leeuwen WF, Cohen JI,**  
775 **Kinchington PR, Messaoudi I, Bienkowska-Szewczyk K, Rensing ME, Rijsewijk FAM,**  
776 **Wiertz EJHJ.** 2011. The Capacity of UL49.5 Proteins To Inhibit TAP Is Widely  
777 Distributed among Members of the Genus Varicellovirus. *J Virol* **85**:2351–2363.
- 778 56. **Atkins KE, Read AF, Savill NJ, Renz KG, Islam AF, Walkden-Brown SW, Woolhouse**  
779 **MEJ.** 2013. Vaccination and reduced cohort duration can drive virulence evolution:  
780 Marek’s disease virus and industrialized agriculture. *Evolution* **67**:851–860.
- 781 57. **Atkins KE, Read AF, Walkden-Brown SW, Savill NJ, Woolhouse MEJ.** 2013. The  
782 effectiveness of mass vaccination on Marek’s disease virus (MDV) outbreaks and detection  
783 within a broiler barn: a modeling study. *Epidemics* **5**:208–217.
- 784 58. **Read AF, Baigent SJ, Powers C, Kgosana LB, Blackwell L, Smith LP, Kennedy DA,**  
785 **Walkden-Brown SW, Nair VK.** 2015. Imperfect Vaccination Can Enhance the  
786 Transmission of Highly Virulent Pathogens. *PLOS Biol* **13**:e1002198.
- 787 59. **Arvin AM, Gershon AA.** 1996. Live Attenuated Varicella Vaccine. *Annu Rev Microbiol*  
788 **50**:59–100.
- 789 60. **Pellett PE, Roizman B.** 2013. Herpesviridae, p. 1802–1822. *In* *Fields Virology*, 6th ed.  
790 Lippincott Williams & Wilkins, Philadelphia, PA.
- 791 61. **Islam A, Harrison B, Cheetham BF, Mahony TJ, Young PL, Walkden-Brown SW.**  
792 2004. Differential amplification and quantitation of Marek’s disease viruses using real-time  
793 polymerase chain reaction. *J Virol Methods* **119**:103–113.
- 794 62. **Altschul SF, Gish W, Miller W, Myers EW, Lipman DJ.** 1990. Basic local alignment  
795 search tool. *J Mol Biol* **215**:403–410.
- 796 63. **Spatz SJ, Schat KA.** 2011. Comparative genomic sequence analysis of the Marek’s disease  
797 vaccine strain SB-1. *Virus Genes* **42**:331–338.

*Pandey et al., submitted for review.*

- 798 64. **Kuhn JH, Bao Y, Bavari S, Becker S, Bradfute S, Brister JR, Bukreyev AA,**  
799 **Chandran K, Davey RA, Dolnik O, Dye JM, Enterlein S, Hensley LE, Honko AN,**  
800 **Jahrling PB, Johnson KM, Kobinger G, Leroy EM, Lever MS, Mühlberger E, Netesov**  
801 **SV, Olinger GG, Palacios G, Patterson JL, Paweska JT, Pitt L, Radoshitzky SR,**  
802 **Saphire EO, Smither SJ, Swanepoel R, Towner JS, van der Groen G, Volchkov VE,**  
803 **Wahl-Jensen V, Warren TK, Weidmann M, Nichol ST.** 2013. Virus nomenclature below  
804 the species level: a standardized nomenclature for natural variants of viruses assigned to the  
805 family Filoviridae. *Arch Virol* **158**:301–311.
- 806 65. **Szpara ML, Parsons L, Enquist LW.** 2010. Sequence variability in clinical and laboratory  
807 isolates of herpes simplex virus 1 reveals new mutations. *J Virol* **84**:5303–13.
- 808 66. **Watson G, Xu W, Reed A, Babra B, Putman T, Wick E, Wechsler SL, Rohrmann GF,**  
809 **Jin L.** 2012. Sequence and comparative analysis of the genome of HSV-1 strain McKrae.  
810 *Virology* **433**:528–37.
- 811 67. **Koboldt DC, Zhang Q, Larson DE, Shen D, McLellan MD, Lin L, Miller CA, Mardis**  
812 **ER, Ding L, Wilson RK.** 2012. VarScan 2: Somatic mutation and copy number alteration  
813 discovery in cancer by exome sequencing. *Genome Res* **22**:568–576.
- 814 68. **Nakamura K, Oshima T, Morimoto T, Ikeda S, Yoshikawa H, Shiwa Y, Ishikawa S,**  
815 **Linak MC, Hirai A, Takahashi H, Altaf-Ul-Amin M, Ogasawara N, Kanaya S.** 2011.  
816 Sequence-specific error profile of Illumina sequencers. *Nucleic Acids Res* **39**:1–13.
- 817 69. **Cingolani P, Platts A, Wang LL, Coon M, Nguyen T, Wang L, Land SJ, Lu X, Ruden**  
818 **DM.** 2012. A program for annotating and predicting the effects of single nucleotide  
819 polymorphisms, SnpEff. *Fly (Austin)* **6**:80–92.
- 820 70. **Cingolani P, Patel VM, Coon M, Nguyen T, Land SJ, Ruden DM, Lu X.** 2012. Using  
821 *Drosophila melanogaster* as a Model for Genotoxic Chemical Mutational Studies with a  
822 New Program, SnpSift. *Front Genet* **3**.
- 823 71. **Roy S, Schreiber E.** 2014. Detecting and Quantifying Low Level Gene Variants in Sanger  
824 Sequencing Traces Using the ab1 Peak Reporter Tool. *J Biomol Tech JBT* **25**:S13–S14.
- 825 72. **Katoh K, Misawa K, Kuma K, Miyata T.** 2002. MAFFT: a novel method for rapid  
826 multiple sequence alignment based on fast Fourier transform. *Nucleic Acids Res* **30**:3059–  
827 3066.
- 828 73. **JUKES TH, CANTOR CR.** 1969. CHAPTER 24 - Evolution of Protein Molecules, p. 21–  
829 132. *In* MUNRO, HN (ed.), *Mammalian Protein Metabolism*. Academic Press.
- 830 74. **Saitou N, Nei M.** 1987. The neighbor-joining method: a new method for reconstructing  
831 phylogenetic trees. *Mol Biol Evol* **4**:406–425.
- 832 75. **Tamura K, Stecher G, Peterson D, Filipowski A, Kumar S.** 2013. MEGA6: Molecular  
833 Evolutionary Genetics Analysis Version 6.0. *Mol Biol Evol* **30**:2725–2729.

*Pandey et al., submitted for review.*

834 76. **Felsenstein J.** 1985. Confidence Limits on Phylogenies: An Approach Using the Bootstrap.  
835 *Evolution* **39**:783–791.

836

Pandey et al., submitted for review.

837 **Table 1: Field sample statistics and assembly of MDV-1 consensus genomes**

| Line # | Category <sup>a</sup>                 | Farm A - dust 1   | Farm A - dust 2   | Farm B - dust     | Farm B - feather 1 | Farm B - feather 2 |
|--------|---------------------------------------|-------------------|-------------------|-------------------|--------------------|--------------------|
| 1      | <b>Nanograms of DNA</b>               | 120               | 127               | 144               | 12                 | 27                 |
| 2      | <b>% MDV-1</b>                        | 2.4%              | 1.3%              | 0.6%              | 40.6%              | 5.7%               |
| 3      | <b>% MDV-2</b>                        | 4.6%              | 2.7%              | 5.9%              | 0.1%               | 0%                 |
| 4      | <b>Total Reads<sup>b</sup></b>        | $1.4 \times 10^7$ | $2.5 \times 10^7$ | $2.7 \times 10^7$ | $3.9 \times 10^5$  | $3.4 \times 10^5$  |
| 5      | <b>MDV-specific reads<sup>b</sup></b> | $3.7 \times 10^5$ | $5.1 \times 10^5$ | $1.4 \times 10^6$ | $1.0 \times 10^5$  | $1.7 \times 10^5$  |
| 6      | <b>% MDV specific reads</b>           | 2.6%              | 2.0%              | 5.2%              | 26.9%              | 48.3%              |
| 7      | <b>Average depth (X-fold)</b>         | 271               | 333               | 597               | 44                 | 68                 |
| 8      | <b>Genome length</b>                  | 177,967           | 178,049           | 178,169           | 178,327            | 178,540            |
| 9      | <b>NCBI accession number</b>          | KU173116          | KU173115          | KU173119          | KU173117           | KU173118           |

838 <sup>a</sup>Lines 1-3 refer to sample preparation, lines 4-6 to Illumina MiSeq output, and lines 7-9 to new  
839 viral genomes.

840 <sup>b</sup>Sequence read counts in line 4 and 5 are the sum of forward and reverse reads for each sample.

841

842

Pandey et al., submitted for review.

843 **Table 2. Pair-wise DNA identity and variant proteins between pairs of**  
 844 **consensus genomes**

| Comparisons                                       | % DNA identity | Total # bp different | Intergenic        |      | Genic                          |                       |                                   |
|---------------------------------------------------|----------------|----------------------|-------------------|------|--------------------------------|-----------------------|-----------------------------------|
|                                                   |                |                      | INDELs (# events) | SNPs | INDELs (# events)              | Synonymous SNPs       | Non-synonymous SNPs               |
| <b>Different farms: Dust vs. dust</b>             |                |                      |                   |      |                                |                       |                                   |
| Farm B-dust vs. Farm A-dust 1                     | 99.73          | 353                  | 143 (22)          | 140  | 66 (1) in DNA-pol <sup>a</sup> | 1 in helicase-primase | 3 (one each in vLIP, LORF2, UL43) |
| Farm B-dust vs. Farm A-dust 2                     | 99.87          | 195                  | 49 (14)           | 76   | 66 (1) in DNA-pol <sup>a</sup> | 1 in helicase-primase | 3 (one each in vLIP, LORF2, UL43) |
| <b>Same farm, same time: Dust vs. host</b>        |                |                      |                   |      |                                |                       |                                   |
| Farm B-dust vs. Farm B-feather 1                  | 99.64          | 552                  | 476 (11)          | 6    | 66 (1) in DNA-pol <sup>a</sup> | 1 in helicase-primase | 3 (one each in vLIP, LORF2, UL43) |
| Farm B-dust vs. Farm B-feather 2                  | 99.52          | 687                  | 572 (19)          | 45   | 66 (1) in DNA-pol <sup>a</sup> | 1 in helicase-primase | 3 (one each in vLIP, LORF2, UL43) |
| <b>Same farm: Separated in time and space</b>     |                |                      |                   |      |                                |                       |                                   |
| Farm A-dust 1 vs. Farm A-dust 2                   | 99.76          | 338                  | 170 (20)          | 168  | 0                              | 0                     | 0                                 |
| <b>Same farm, same time: one host vs. another</b> |                |                      |                   |      |                                |                       |                                   |
| Farm B-feather 1 vs. Farm B-feather 2             | 99.38          | 973                  | 972 (9)           | 1    | 0                              | 0                     | 0                                 |

<sup>a</sup>Abbreviations refer to DNA polymerase processivity subunit protein UL42 (MDV055); helicase-primase subunit UL8 (MDV020); vLIP, lipase homolog (MDV010); LORF2, immune evasion protein (MDV012); UL43 membrane protein (MDV056)

845

846

847 **Figures**

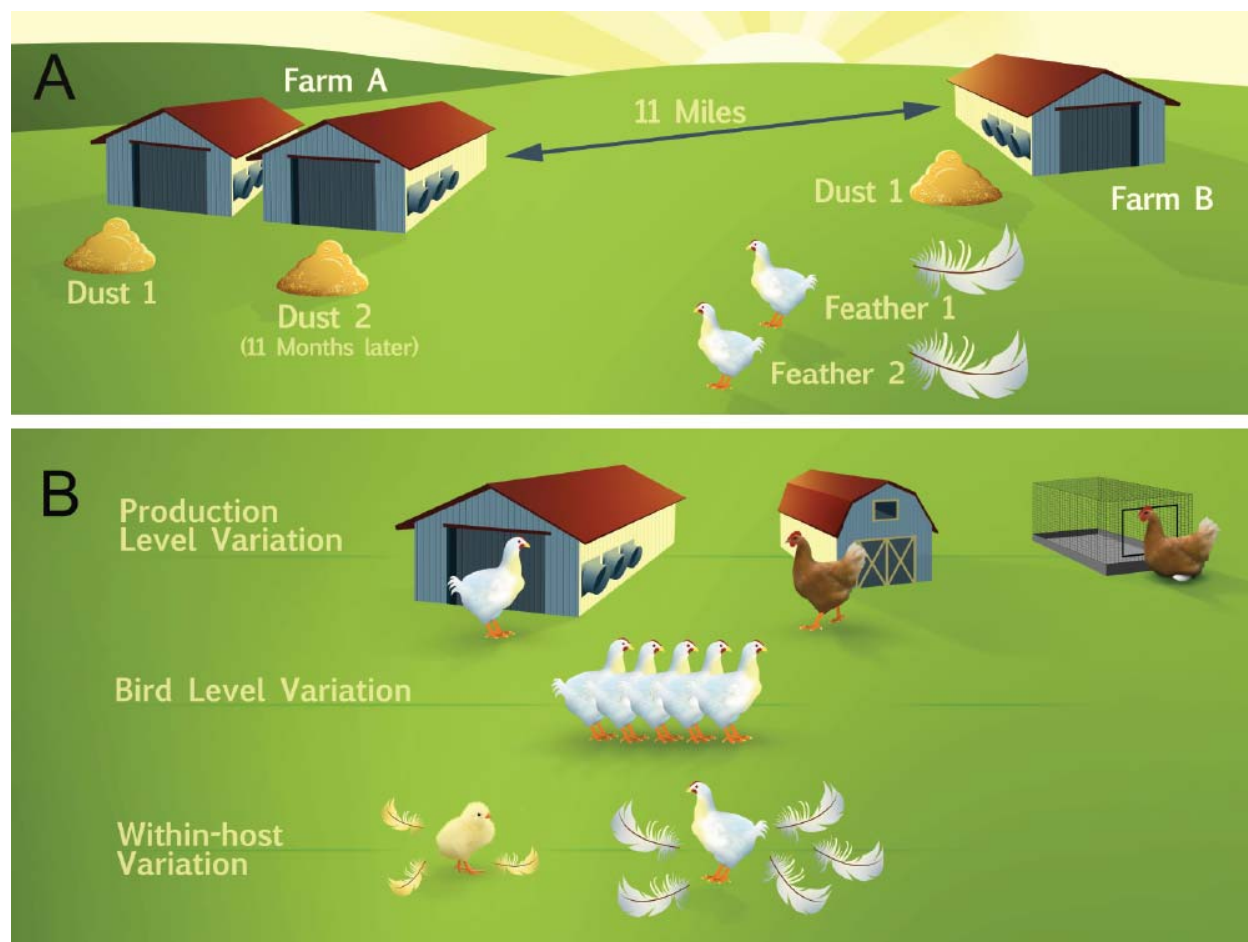

848

849 **Figure 1. Diagram of samples collected for genome sequencing of field isolates of MDV.**

850 **(A)** Samples collected for genome sequencing were sourced from two Pennsylvania farms with  
851 large-scale operations that house approximately 25,000-30,000 individuals per building. These  
852 farms were separated by 11 miles. On Farm A, two separate collections of dust were made 11  
853 months apart. On Farm B, we collected one dust sample and individual feathers from several  
854 hosts, all at a single point in time. In total, three dust collections and two feathers were used to  
855 generate five consensus genomes of MDV field isolates (**Tables 1-3**). **(B)** Future comparisons  
856 using these approaches could include an analysis of viral genome variation between scales or  
857 types of production (top row), between different animals within any field site (middle row), or  
858 between different body locations or temporal stages of a single host (bottom row). (Artwork by  
859 Nick Sloff, Penn State University, Department of Entomology).

860

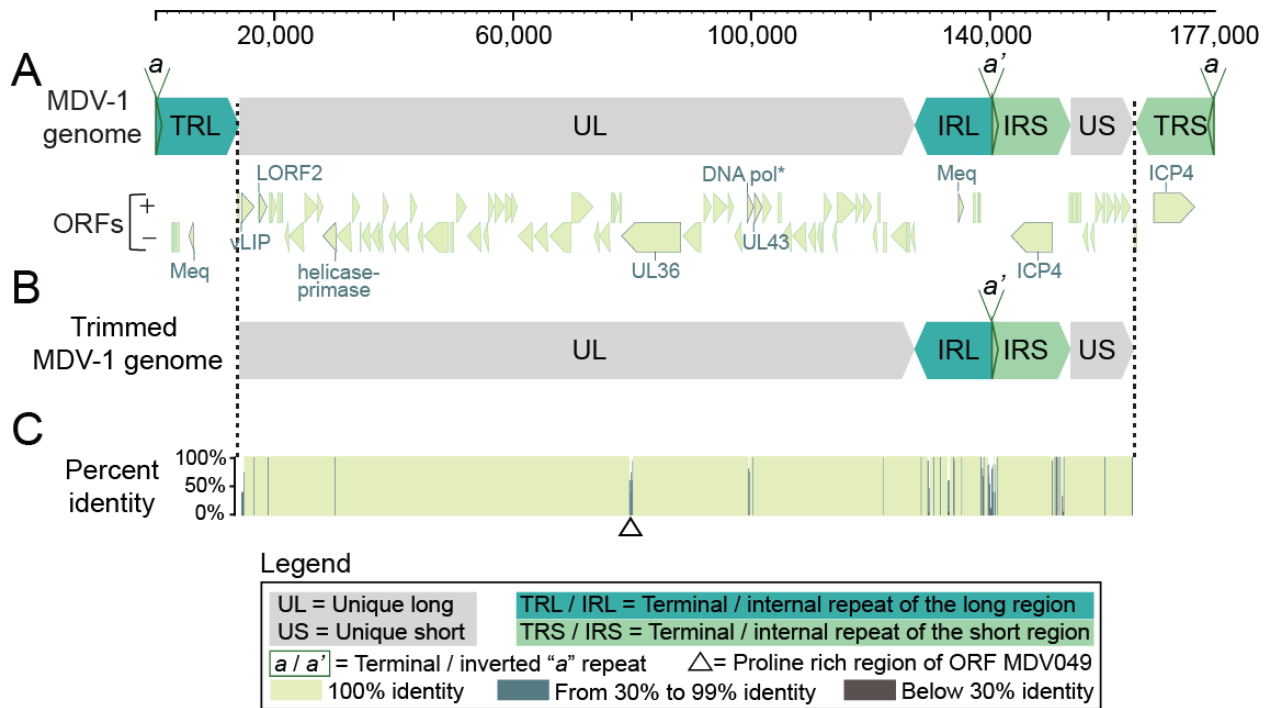

861

862

863 **Figure 2. The complete MDV-1 genome includes two unique regions and two sets of large**

864 **inverted repeats. (A)** The full structure of the MDV-1 genome includes a unique long region

865 (UL) and a unique short regions (US), each of which are flanked large repeats known as the

866 terminal and internal repeats of the long region (TRL and IRL) and the short region (TRS and

867 IRS). Most ORFs (pale green arrows) are located in the unique regions of the genome. ORFs

868 implicated in MDV pathogenesis are outlined and labeled; these include ICP4 (MDV084), UL36

869 (MDV049), and Meq (MDV005 and MDV076) (see Results for complete list). **(B)** A trimmed

870 genome format without the terminal repeat regions was used for analyses in order to not over-

871 represent the repeat regions. **(C)** Percent identity from mean pairwise comparison of five

872 consensus genomes, plotted spatially along the length of the genome. Darker colors indicate

873 lower percent identity (see Legend).

874  
875

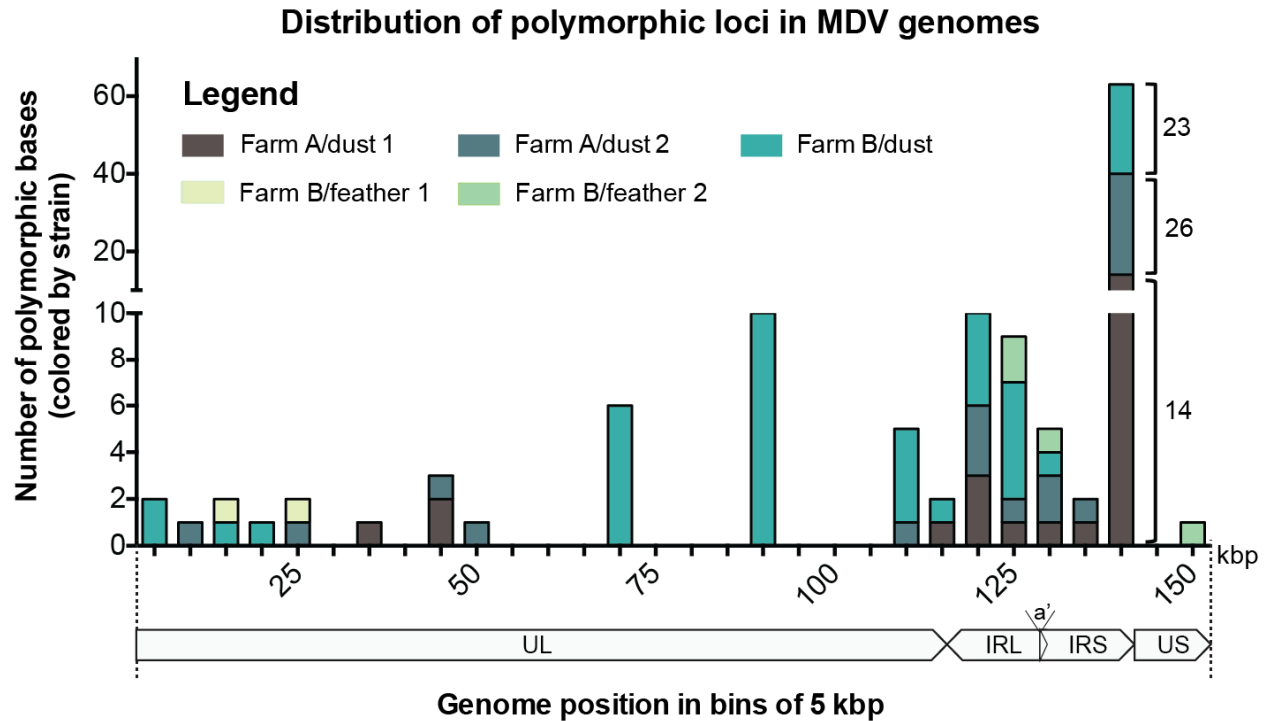

876  
877

878 **Figure 3: Genome-wide distribution of polymorphic bases within each consensus genome.**

879 Polymorphic base calls from each MDV genome were grouped in bins of 5 kb and the sum of  
880 polymorphisms in each bin was plotted. Farm B-dust (aqua) contained the largest number of  
881 polymorphic bases, with the majority occurring in the repeat region (IRL/IRS). Farm A-dust 1  
882 (brown) and Farm A-dust 2 (gray) harbored fewer polymorphic bases, with similar distribution to  
883 Farm B-dust. Polymorphic bases detected in feather genomes were more rare, although this  
884 likely reflects their lower coverage depth (see **Table 1**). Note that the upper and lower segments  
885 of the y-axis have different scales; the number of polymorphic bases per genome for the split  
886 column on the right are labeled for clarity.

887

888



889

### Number of observed vs. expected polymorphisms in each genome

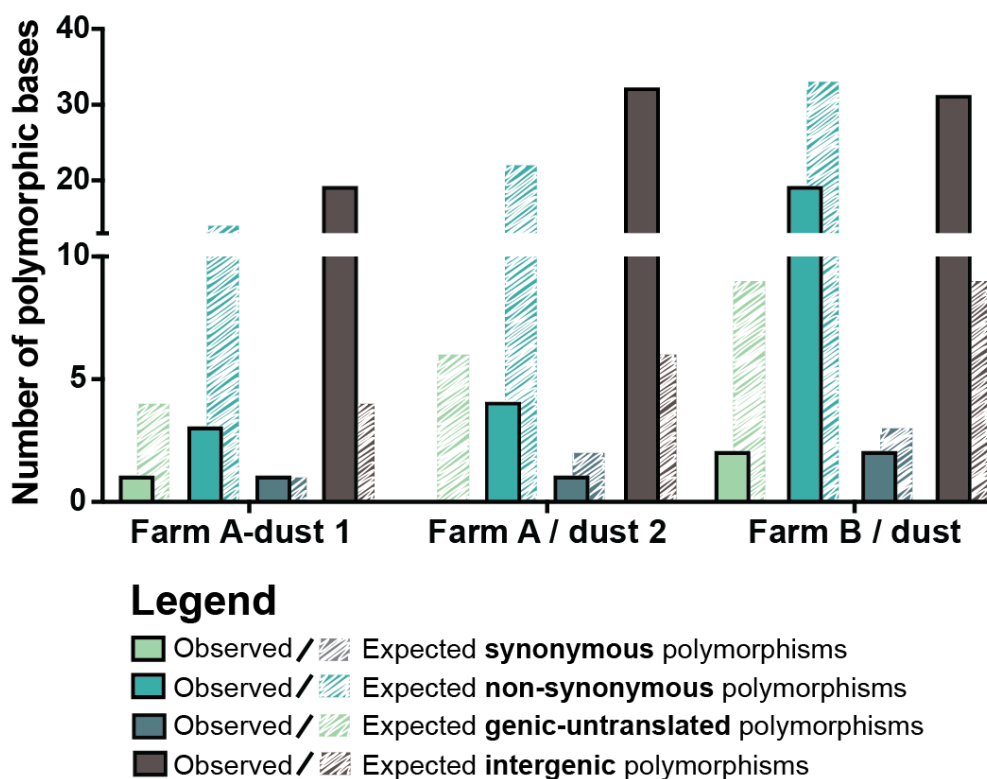

890

891

892 **Figure 4. Observed vs. expected polymorphism categories for each consensus genome.** Each

893 consensus genome was analyzed for the presence of polymorphic loci (see Methods for details).

894 Observed polymorphic loci (solid bars) were categorized as causing synonymous (green) or non-

895 synonymous (aqua) mutations, or as genic-untranslated (gray) or intergenic (brown). The

896 expected outcomes (striped bars) for a random distribution of polymorphisms is plotted behind

897 the observed outcomes (solid bars) for each category. For all genomes there was a significant

898 difference of the observed-vs.-expected intergenic polymorphisms, relative to those of other

899 categories.

900

901

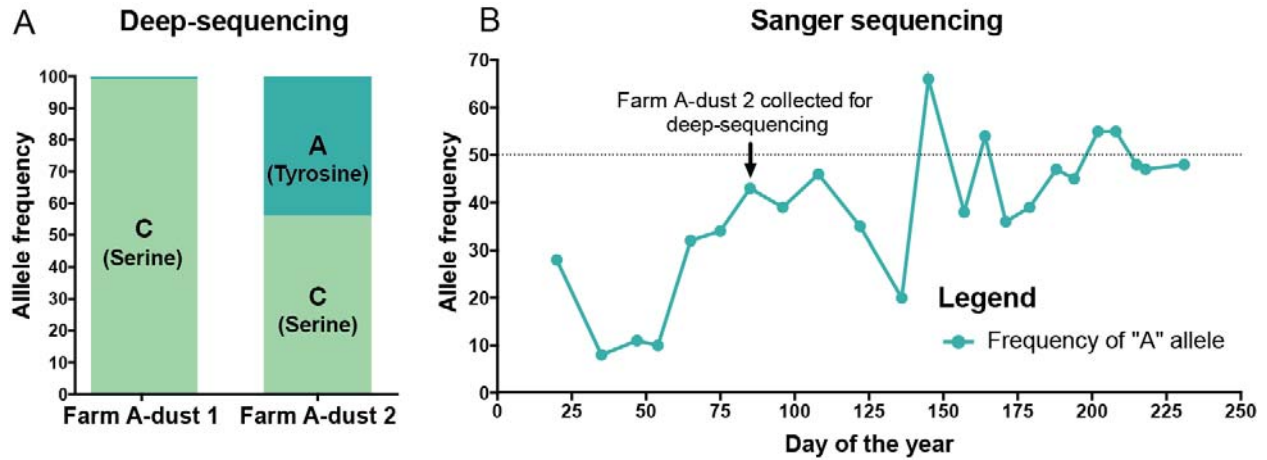

902

903

904 **Figure 5: A new polymorphic locus in ICP4, and its shifting allele frequency over time. (A)**

905 HTS data revealed a new polymorphic locus in ICP4 (MDV084) at nucleotide position 5,495. In

906 the spatially- and temporally-separated dust samples from Farm A (see **Figure 1A** and **Methods**

907 for details), we observed a different prevalence of C (encoding serine) and A (encoding tyrosine)

908 alleles. **(B)** Using targeted Sanger sequencing of this locus, time-separated dust samples

909 spanning nine months were Sanger-sequenced to track polymorphism frequency at this locus

910 over time. The major and minor allele frequencies at this locus varied widely across time, and the

911 major allele switched from C to A more than twice during this time.

912

Supplemental Material for Pandey et al., *DNA from dust: comparative genomics of vaccine-break virus in the field.*

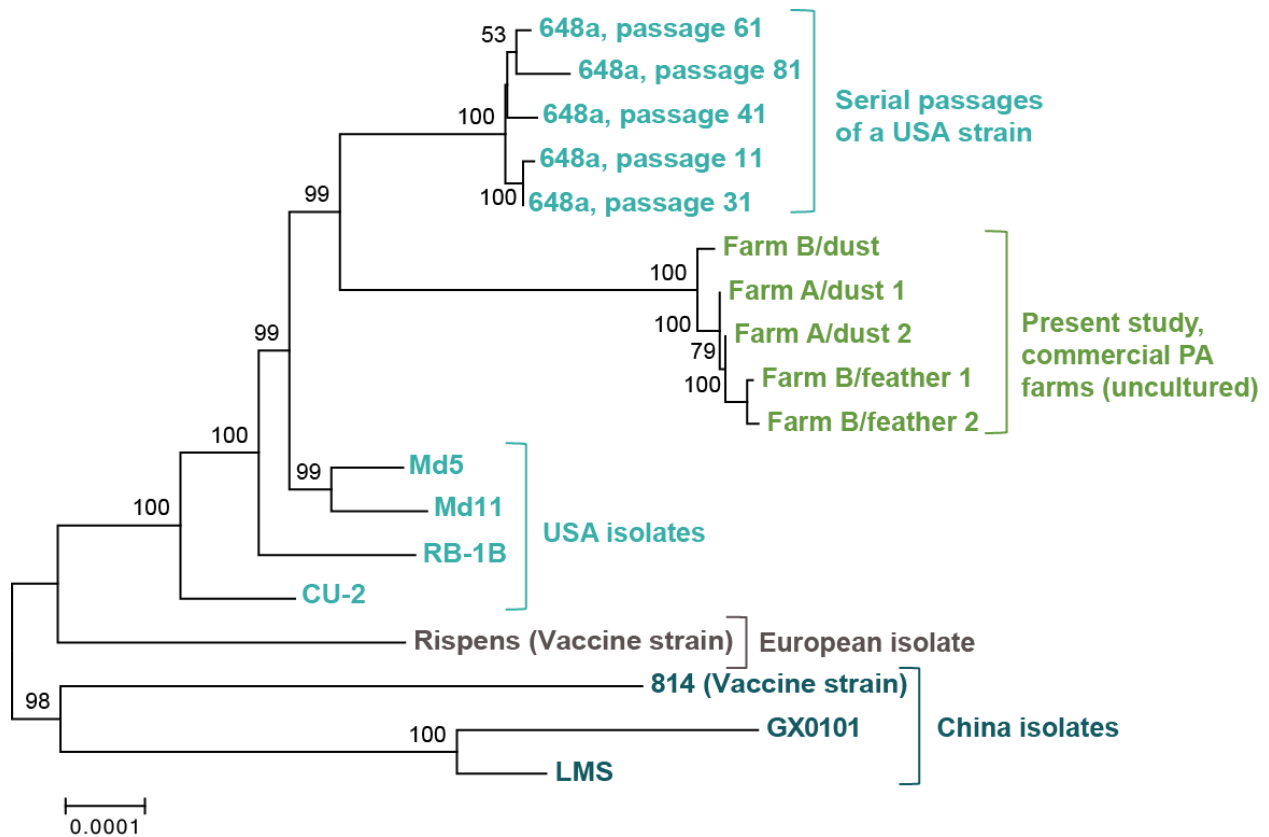

913

914

915 **Figure 6: Dendrogram of genetic distances among all sequenced MDV-1 genomes.** Using a

916 multiple-genome alignment of all available complete MDV-1 genomes, we calculated the

917 evolutionary distances between genomes using the Jukes-Cantor model. A dendrogram was then

918 created using the neighbor-joining method in MEGA with 1000 bootstraps. The five new field-

919 sampled MDV-1 genomes (green) formed a separate group between the two clusters of USA

920 isolates (blue). The European vaccine strain (Rispens) formed a separate clade, as did the three

921 Chinese MDV-1 genomes (aqua). GenBank Accessions for all strains: new genomes, Table 1;

922 Passage 11-648a, JQ806361; Passage 31-648a, JQ806362; Passage 61-648a, JQ809692; Passage

923 41-648a, JQ809691; Passage 81-648a, JQ820250; CU-2, EU499381; RB-1B, EF523390; Md11,

924 170950; Md5, AF243438; Rispens (CVI988), DQ530348; 814, JF742597; GX0101, JX844666;

925 LMS, JQ314003.

*Supplemental Material for Pandey et al., DNA from dust: comparative genomics of vaccine-break virus in the field.*

## 926 **Supplemental Material Legends and Descriptions**

927 **Supplemental Figure S1. Procedures for enrichment and isolation of MDV DNA from dust**  
928 **or individual feather follicles. (A)** Procedure for enrichment of MDV DNA using dust as the  
929 source of viral DNA. Vortexing, centrifugation and sonication were essential to release cell-  
930 associated virus into the solution. The virus-containing supernatant was then passed through 0.8  
931  $\mu\text{M}$  and 0.22  $\mu\text{M}$  filters for removal of larger contaminants. The flow-through was treated with  
932 DNase and the viral particles were captured using 0.1  $\mu\text{M}$  filter. The membrane of the 0.1  $\mu\text{M}$   
933 filter was then excised and used for extraction of the viral DNA. **(B)** Procedure for enrichment of  
934 MDV DNA using chicken feather follicle as the source of viral DNA. A feather was  
935 mechanically disrupted (bead-beating) and treated with trypsin to break open host cells and  
936 release cell-free virus into the solution. The sample was then treated with DNase to remove  
937 contaminant DNA. Finally, the viral capsids were lysed to obtain viral genomic DNA.

938

939 **Supplemental Figure S2. Workflow for computational enrichment for MDV sequences and**  
940 **subsequent viral genome assembly and taxonomic profiling.** The VirGA workflow (38)  
941 requires an input of high-quality HTS data from the viral genome of interest. For this study we  
942 added an additional step that selected MDV-like sequence reads from the milieu of dust and  
943 feather samples. The sequence reads of interest were obtained by using BLAST to compare all  
944 reads against a custom MDV database with an E-value of  $10^{-2}$ ; these were then submitted to  
945 VirGA for assembly. Taxonomic profiling followed a similar path using NCBI's all-nucleotide  
946 database to identify the taxonomic kingdom for each sequence read. In this workflow diagram,  
947 parallelograms represent data outputs while rectangles represent computational actions.

948

*Supplemental Material for Pandey et al., DNA from dust: comparative genomics of vaccine-break virus in the field.*

949 **Supplemental Figure S3: Genome-wide distribution of polymorphisms within each**  
950 **consensus genome, using high-stringency criteria.** Polymorphic base calls from each MDV  
951 genome were grouped by position in bins of 5 kb and the sum of polymorphisms in each bin was  
952 plotted. Stricter parameters of polymorphism detection (see **Methods** for details) revealed a  
953 similar distribution to those in **Figure 3**. No polymorphisms were detected in feather-derived  
954 genomes using high-stringency criteria, due to their lower coverage depth (see **Table 1**). Note  
955 that the upper and lower segments of the y-axis have different scales; the number of polymorphic  
956 bases per segment for the split column on the right are thus labeled on the graph.

957

958 **Supplemental Figure S4. Taxonomic diversity in dust and chicken feathers from Farm B.**

959 We used an iterative BLASTN workflow to generate taxonomic profiles for all samples from  
960 Farm B (see **Methods** for details). Major categories are shown here, with a full list of taxa (to  
961 family level) in **Supplemental Table S7**. Farm B-feather 1 and Farm B-feather 2 show less  
962 overall diversity, as would be expected from direct host-sampling, vs. the environmental mixture  
963 of the dust samples. Since the viral DNA enrichment procedures remove variable amounts of  
964 host and environmental contaminants, the proportion of taxa present is representative but not  
965 fully descriptive of those present initially.

966

967 **Supplemental Table S1: Yield and percent MDV1+MDV2 and total nanograms of DNA in**  
968 **each sample for Farm A-dust 1**

969

970 **Supplemental Table S2: Yield and percent MDV1+MDV2 and total nanograms of DNA in**  
971 **each sample for Farm A-dust 2**

*Supplemental Material for Pandey et al., DNA from dust: comparative genomics of vaccine-break virus in the field.*

972

973 **Supplemental Table S3:** Yield and percent MDV1+MDV2 and total nanograms of DNA in

974 each sample for Farm B-dust

975

976 **Supplemental Table S4:** Yield and percent MDV1+MDV2 and total nanograms of DNA in

977 each sample for Farm B-feathers

978

979 **Supplemental Table S5:** Summary and annotation of all polymorphic loci detected in MDV1

980 consensus genomes.

981

982 **Supplemental Table S6:** Chi-squared values from pairwise comparisons of different categories

983 of polymorphisms.

984

## Supplemental Figures

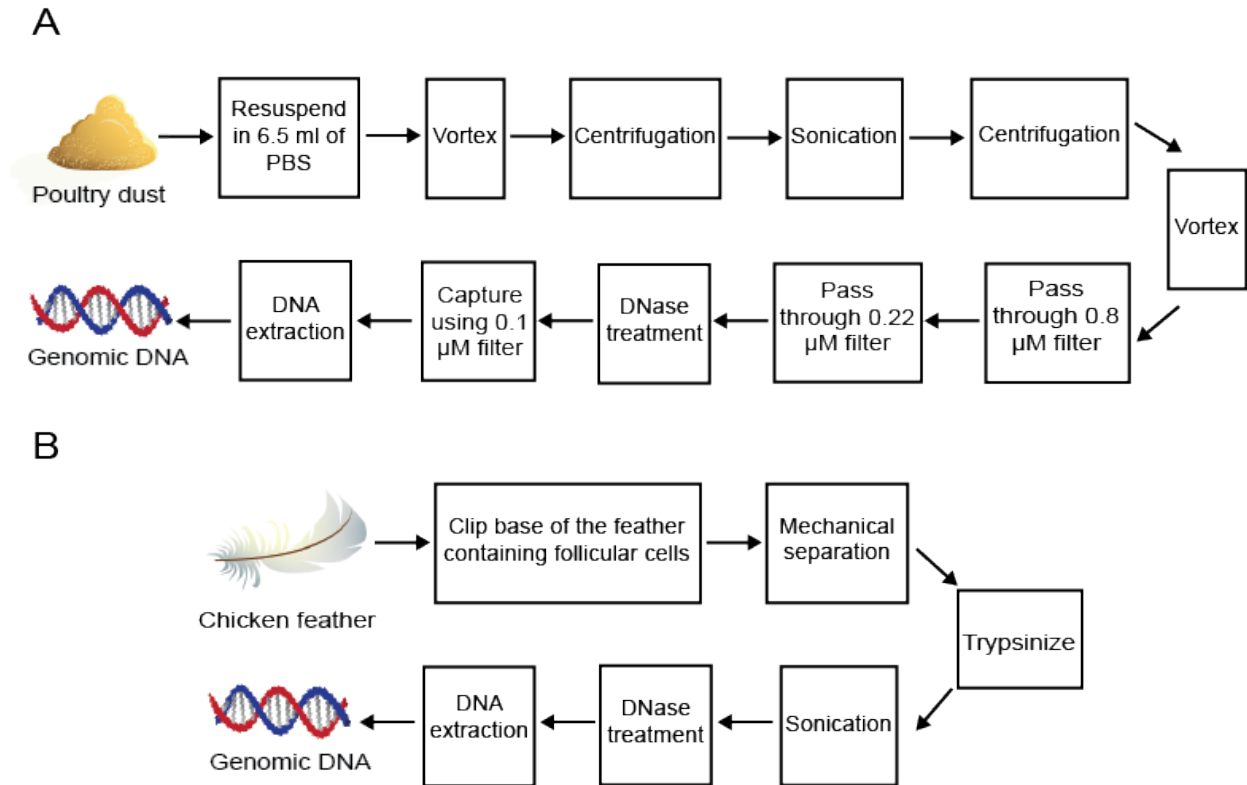

**Supplemental Figure S1. Procedures for enrichment and isolation of MDV DNA from dust or individual feather follicles. (A)** Procedure for enrichment of MDV DNA using dust as the source of viral DNA. Vortexing, centrifugation and sonication were essential to release cell-associated virus into the solution. The virus-containing supernatant was then passed through 0.8  $\mu\text{M}$  and 0.22  $\mu\text{M}$  filters for removal of larger contaminants. The flow-through was treated with DNase and the viral particles were captured using 0.1  $\mu\text{M}$  filter. The membrane of the 0.1  $\mu\text{M}$  filter was then excised and used for extraction of the viral DNA. **(B)** Procedure for enrichment of MDV DNA using chicken feather follicle as the source of viral DNA. A feather was mechanically disrupted (bead-beating) and treated with trypsin to break open host cells and release cell-free virus into the solution. The sample was then treated with DNase to remove contaminant DNA. Finally, the viral capsids were lysed to obtain viral genomic DNA.

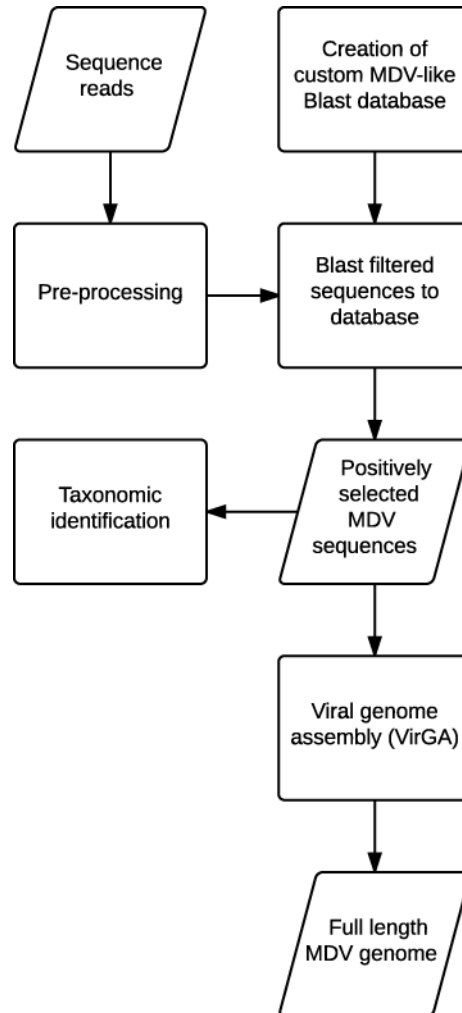

**Supplemental Figure S2. Workflow for computational enrichment for MDV sequences and subsequent viral genome assembly and taxonomic profiling.**

The VirGA workflow (38) requires an input of high-quality HTS data from the viral genome of interest. For this study we added an additional step that selected MDV-like sequence reads from the milieu of dust and feather samples. The sequence reads of interest were obtained by using BLAST to compare all reads against a custom MDV database with an E-value of  $10^{-2}$ ; these were then submitted to VirGA for assembly. Taxonomic profiling followed a similar path using NCBI's all-nucleotide database to identify the taxonomic kingdom for each sequence read. In this workflow diagram, parallelograms represent data outputs while rectangles represent computational actions.



Supplemental Material for Pandey et al., *DNA from dust: comparative genomics of vaccine-break virus in the field.*

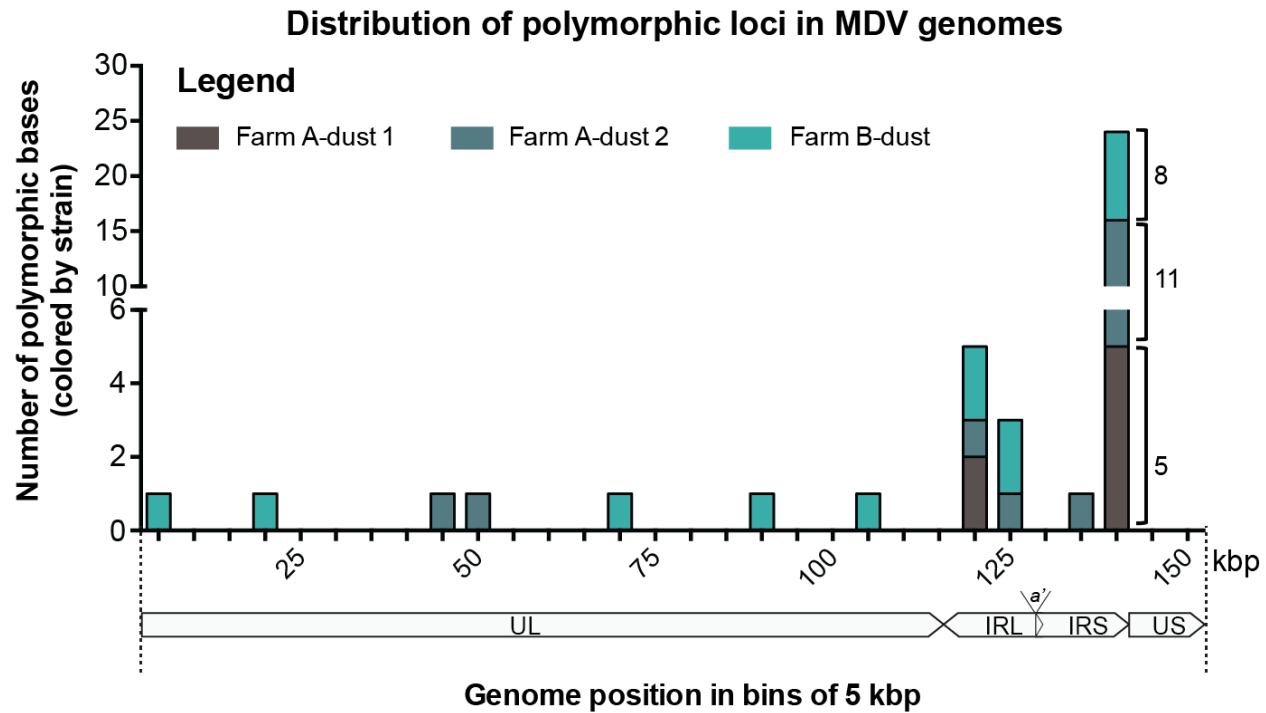

**Supplemental Figure S3: Genome-wide distribution of polymorphisms within each consensus genome, using high-stringency criteria.** Polymorphic base calls from each MDV genome were grouped by position in bins of 5 kb and the sum of polymorphisms in each bin was plotted. Stricter parameters of polymorphism detection (see **Methods** for details) revealed a similar distribution to those in **Figure 3**. No polymorphisms were detected in feather-derived genomes using high-stringency criteria, due to their lower coverage depth (see **Table 1**). Note that the upper and lower segments of the y-axis have different scales; the number of polymorphic bases per segment for the split column on the right are thus labeled on the graph.

*Supplemental Material for Pandey et al., DNA from dust: comparative genomics of vaccine-break virus in the field.*

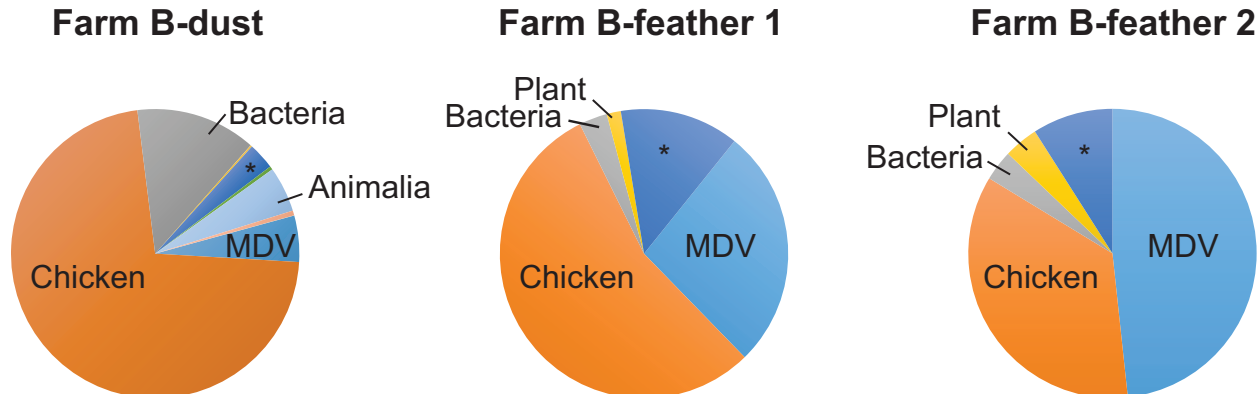

\*Unclassified or low prevalence

#### **Supplemental Figure S4. Taxonomic diversity in dust and chicken feathers from Farm B.**

We used an iterative BLASTN workflow to generate taxonomic profiles for all samples from Farm B (see **Methods** for details). Major categories are shown here, with a full list of taxa (to family level) in **Supplemental Table S7**. Farm B-feather 1 and Farm B-feather 2 show less overall diversity, as would be expected from direct host-sampling, vs. the environmental mixture of the dust samples. Since the viral DNA enrichment procedures remove variable amounts of host and environmental contaminants, the proportion of taxa present is representative but not fully descriptive of those present initially.

*Supplemental Material for Pandey et al., DNA from dust: comparative genomics of vaccine-break virus in the field.*

## Supplemental Tables

**Supplemental Table S1: Yield and percent MDV1+MDV2 and total nanograms of DNA in each sample for Farm A-dust 1**

| Samples  | Washes on 0.1 $\mu\text{m}$ filter* | %MDV-1      | %MDV-2       | % MDV1 + MDV2 | DNA (ng)    |
|----------|-------------------------------------|-------------|--------------|---------------|-------------|
| 1        | 0                                   | 2.88        | 5.44         | 8.3           | 6.94        |
| 2        | 0                                   | 2.03        | 5.12         | 7.2           | 6.59        |
| 3        | 0                                   | 4.16        | 8.39         | 12.5          | 6.73        |
| 4        | 0                                   | 2.51        | 4.73         | 7.2           | 4.71        |
| 5        | 0                                   | 1.66        | 3.30         | 4.96          | 6.97        |
| <b>6</b> | <b>1</b>                            | <b>9.13</b> | <b>13.99</b> | <b>23.12</b>  | <b>2.69</b> |
| <b>7</b> | <b>1</b>                            | <b>9.29</b> | <b>15.70</b> | <b>24.99</b>  | <b>2.16</b> |
| <b>8</b> | <b>1</b>                            | <b>5.86</b> | <b>10.91</b> | <b>16.77</b>  | <b>3.36</b> |
| 9        | 0                                   | 1.89        | 2.98         | 4.9           | 9.81        |
| 10       | 0                                   | 1.76        | 2.90         | 4.7           | 17.35       |
| 11       | 0                                   | 2.69        | 5.33         | 8.02          | 8.96        |
| 12       | 0                                   | 4.49        | 7.80         | 12.29         | 4.14        |
| 13       | 0                                   | 1.16        | 2.49         | 3.65          | 20.00       |
| 14       | 0                                   | 1.36        | 2.83         | 4.19          | 19.47       |

\*Samples that were washed before lysis (bold) yielded a higher percent MDV DNA, but less DNA overall.

*Supplemental Material for Pandey et al., DNA from dust: comparative genomics of vaccine-break virus in the field.*

**Supplemental Table S2: Yield and percent MDV1+MDV2 and total nanograms of DNA in each sample for Farm A-dust 2**

| <b>Samples</b> | <b>Washes on 0.1 <math>\mu</math>M filter*</b> | <b>%MDV-1</b> | <b>% MDV-2</b> | <b>%MDV1 + MDV2</b> | <b>DNA (ng)</b> |
|----------------|------------------------------------------------|---------------|----------------|---------------------|-----------------|
| 1              | 0                                              | 1.50          | 3.16           | 4.66                | 10.69           |
| 2              | 0                                              | 2.55          | 5.62           | 8.17                | 7.18            |
| 3              | 0                                              | 1.36          | 3.68           | 5.04                | 7.62            |
| 4              | 0                                              | 1.38          | 2.94           | 4.32                | 9.84            |
| <b>5</b>       | <b>1</b>                                       | <b>2.71</b>   | <b>6.19</b>    | <b>8.90</b>         | <b>4.11</b>     |
| <b>6</b>       | <b>1</b>                                       | <b>3.08</b>   | <b>5.87</b>    | <b>8.95</b>         | <b>4.37</b>     |
| <b>7</b>       | <b>1</b>                                       | <b>2.68</b>   | <b>4.91</b>    | <b>7.59</b>         | <b>5.88</b>     |
| <b>8</b>       | <b>1</b>                                       | <b>3.49</b>   | <b>6.24</b>    | <b>9.73</b>         | <b>4.88</b>     |
| <b>9</b>       | <b>1</b>                                       | <b>4.09</b>   | <b>7.94</b>    | <b>12.03</b>        | <b>2.66</b>     |
| <b>10</b>      | <b>1</b>                                       | <b>6.42</b>   | <b>10.52</b>   | <b>16.94</b>        | <b>3.15</b>     |
| 11             | 0                                              | 0.26          | 0.91           | 1.17                | 20.35           |
| 12             | 0                                              | 0.19          | 0.56           | 0.75                | 26.09           |
| 13             | 0                                              | 0.24          | 0.93           | 1.17                | 15.13           |
| 14             | 0                                              | 0.36          | 1.21           | 1.57                | 5.62            |

\*Samples that were washed before lysis (bold) yielded a higher percent MDV DNA, but less DNA overall.

*Supplemental Material for Pandey et al., DNA from dust: comparative genomics of vaccine-break virus in the field.*

**Supplemental Table S3: Yield and percent MDV1+MDV2 and total nanograms of DNA in each sample for Farm B-dust**

| <b>Samples</b> | <b>Washes on 0.1 <math>\mu</math>M filter*</b> | <b>% MDV-1</b> | <b>% MDV-2</b> | <b>% MDV-1 +MDV-2</b> | <b>DNA (ng)</b> |
|----------------|------------------------------------------------|----------------|----------------|-----------------------|-----------------|
| 1              | 0                                              | 0.84           | 6.68           | 7.52                  | 14.10           |
| 2              | 0                                              | 0.46           | 5.20           | 5.66                  | 26.64           |
| 3              | 0                                              | 0.65           | 4.85           | 5.50                  | 19.43           |
| 4              | 0                                              | 0.75           | 5.91           | 6.66                  | 16.84           |
| 5              | 0                                              | 0.23           | 3.67           | 3.90                  | 25.90           |
| 6              | 0                                              | 0.53           | 4.65           | 5.18                  | 23.50           |
| 7              | <b>1</b>                                       | <b>1.10</b>    | <b>14.50</b>   | <b>15.60</b>          | <b>4.59</b>     |
| 8              | <b>1</b>                                       | <b>0.95</b>    | <b>15.77</b>   | <b>16.72</b>          | <b>4.29</b>     |
| 9              | <b>1</b>                                       | <b>0.95</b>    | <b>14.40</b>   | <b>15.35</b>          | <b>4.81</b>     |
| 10             | <b>1</b>                                       | <b>1.02</b>    | <b>10.69</b>   | <b>11.71</b>          | <b>3.59</b>     |

\*Samples that were washed before lysis (bold) yielded a higher percent MDV DNA, but less DNA overall.

**Supplemental Table S4: Yield and percent MDV1+MDV2 and total nanograms of DNA in each sample for Farm B-feathers**

| <b>Samples</b> | <b>% MDV-1</b> | <b>% MDV-2</b> | <b>% MDV-1 +MDV-2</b> | <b>DNA (ng)</b> |
|----------------|----------------|----------------|-----------------------|-----------------|
| Feather 1      | 40.59          | 0.12           | 40.72                 | 11.97           |
| Feather 2      | 5.68           | 0.02           | 5.70                  | 27.36           |

Supplemental Table S5. Summary and annotation of all polymorphic loci detected in MDV1 consensus genomes. DNA from dust: comparative genomics of large DNA viruses in field surveillance samples

**Farm A/dust 1 (high stringency)**

| Isolate       | Position in the genome | Major allele | Minor allele | Minor allele frequency | Reads supporting major allele on forward strand | Reads supporting major allele on reverse strand | Reads supporting minor allele on forward strand | Reads supporting minor allele on reverse strand | Percent reads supporting minor allele on forward strand | Percent reads supporting minor allele on reverse strand | Type of variation | Gene | Function |
|---------------|------------------------|--------------|--------------|------------------------|-------------------------------------------------|-------------------------------------------------|-------------------------------------------------|-------------------------------------------------|---------------------------------------------------------|---------------------------------------------------------|-------------------|------|----------|
| Farm A/dust 1 | 115376                 | C            | A            | 8.16%                  | 93                                              | 42                                              | 6                                               | 6                                               | 50%                                                     | 50.00%                                                  | Intergenic        | N/A  | N/A      |
| Farm A/dust 1 | 115377                 | C            | A            | 29.20%                 | 51                                              | 29                                              | 21                                              | 12                                              | 64%                                                     | 36.36%                                                  | Intergenic        | N/A  | N/A      |
| Farm A/dust 1 | 137099                 | A            | C            | 34.74%                 | 42                                              | 20                                              | 18                                              | 15                                              | 55%                                                     | 45.45%                                                  | Intergenic        | N/A  | N/A      |
| Farm A/dust 1 | 137101                 | A            | C            | 5.93%                  | 75                                              | 36                                              | 4                                               | 3                                               | 57%                                                     | 42.86%                                                  | Intergenic        | N/A  | N/A      |
| Farm A/dust 1 | 137264                 | A            | G            | 5.22%                  | 87                                              | 40                                              | 5                                               | 2                                               | 71%                                                     | 28.57%                                                  | Intergenic        | N/A  | N/A      |
| Farm A/dust 1 | 138209                 | C            | A            | 8.27%                  | 88                                              | 34                                              | 8                                               | 3                                               | 73%                                                     | 27.27%                                                  | Intergenic        | N/A  | N/A      |
| Farm A/dust 1 | 138281                 | A            | C            | 12.82%                 | 47                                              | 21                                              | 6                                               | 4                                               | 60%                                                     | 40.00%                                                  | Intergenic        | N/A  | N/A      |

**Farm A/dust 2 (high stringency)**

| Isolate       | Position in the genome | Major allele | Minor allele | Minor allele frequency | Reads supporting major allele on forward strand | Reads supporting major allele on reverse strand | Reads supporting minor allele on forward strand | Reads supporting minor allele on reverse strand | Percent reads supporting minor allele on forward strand | Percent reads supporting minor allele on reverse strand | Type of variation      | Gene   | Gene                            |
|---------------|------------------------|--------------|--------------|------------------------|-------------------------------------------------|-------------------------------------------------|-------------------------------------------------|-------------------------------------------------|---------------------------------------------------------|---------------------------------------------------------|------------------------|--------|---------------------------------|
| Farm A/dust 2 | 40519                  | G            | A            | 19.88%                 | 51                                              | 78                                              | 14                                              | 18                                              | 44%                                                     | 56%                                                     | Non-synonymous variant | MDV034 | gH, glycoprotein H; UL22 homol  |
| Farm A/dust 2 | 48554                  | C            | T            | 9.68%                  | 114                                             | 54                                              | 13                                              | 5                                               | 72%                                                     | 28%                                                     | Non-synonymous variant | MDV040 | gB, glycoprotein B; UL27 homol  |
| Farm A/dust 2 | 116937                 | G            | A            | 12.67%                 | 86                                              | 176                                             | 11                                              | 27                                              | 29%                                                     | 71%                                                     | Intergenic             | N/A    | N/A                             |
| Farm A/dust 2 | 121872                 | T            | C            | 36.76%                 | 52                                              | 108                                             | 35                                              | 58                                              | 38%                                                     | 62%                                                     | Genic_UTR              | MDV076 | Meq; oncogene; role in tumor fo |
| Farm A/dust 2 | 130968                 | G            | T            | 43.48%                 | 77                                              | 105                                             | 52                                              | 88                                              | 37%                                                     | 63%                                                     | Non-synonymous variant | MDV084 | ICP4 (RS1) homolog; transactiv  |
| Farm A/dust 2 | 137156                 | C            | A            | 5.17%                  | 81                                              | 139                                             | 4                                               | 8                                               | 33%                                                     | 67%                                                     | Intergenic             | N/A    | N/A                             |
| Farm A/dust 2 | 138433                 | C            | A            | 6.54%                  | 215                                             | 85                                              | 13                                              | 8                                               | 62%                                                     | 38%                                                     | Intergenic             | N/A    | N/A                             |
| Farm A/dust 2 | 138436                 | C            | G            | 7.12%                  | 221                                             | 92                                              | 18                                              | 6                                               | 75%                                                     | 25%                                                     | Intergenic             | N/A    | N/A                             |
| Farm A/dust 2 | 138437                 | T            | A            | 8.19%                  | 218                                             | 96                                              | 20                                              | 8                                               | 71%                                                     | 29%                                                     | Intergenic             | N/A    | N/A                             |
| Farm A/dust 2 | 138505                 | C            | A            | 28.91%                 | 73                                              | 136                                             | 52                                              | 33                                              | 61%                                                     | 39%                                                     | Intergenic             | N/A    | N/A                             |
| Farm A/dust 2 | 138506                 | A            | C            | 9.15%                  | 117                                             | 161                                             | 15                                              | 13                                              | 54%                                                     | 46%                                                     | Intergenic             | N/A    | N/A                             |
| Farm A/dust 2 | 138593                 | C            | G            | 6.19%                  | 81                                              | 222                                             | 10                                              | 10                                              | 50%                                                     | 50%                                                     | Intergenic             | N/A    | N/A                             |
| Farm A/dust 2 | 138594                 | G            | A            | 12.81%                 | 76                                              | 203                                             | 13                                              | 28                                              | 32%                                                     | 68%                                                     | Intergenic             | N/A    | N/A                             |
| Farm A/dust 2 | 138596                 | T            | C            | 5.35%                  | 81                                              | 220                                             | 9                                               | 8                                               | 53%                                                     | 47%                                                     | Intergenic             | N/A    | N/A                             |
| Farm A/dust 2 | 138599                 | A            | C            | 5.40%                  | 87                                              | 211                                             | 5                                               | 12                                              | 29%                                                     | 71%                                                     | Intergenic             | N/A    | N/A                             |
| Farm A/dust 2 | 138748                 | A            | G            | 19.15%                 | 12                                              | 64                                              | 5                                               | 13                                              | 28%                                                     | 72%                                                     | Intergenic             | N/A    | N/A                             |

**Farm B/dust (high stringency)**

| Isolate     | Position in the genome | Major allele | Minor allele | Minor allele frequency | Reads supporting major allele on forward strand | Reads supporting major allele on reverse strand | Reads supporting minor allele on forward strand | Reads supporting minor allele on reverse strand | Percent reads supporting minor allele on forward strand | Percent reads supporting minor allele on reverse strand | Type of variation      | Gene   | Gene                              |
|-------------|------------------------|--------------|--------------|------------------------|-------------------------------------------------|-------------------------------------------------|-------------------------------------------------|-------------------------------------------------|---------------------------------------------------------|---------------------------------------------------------|------------------------|--------|-----------------------------------|
| Farm B/dust | 2072                   | T            | G            | 43.64%                 | 90                                              | 43                                              | 66                                              | 37                                              | 64%                                                     | 36%                                                     | Non-synonymous variant | MDV010 | vLIP; lipase homolog; role in vir |
| Farm B/dust | 15775                  | C            | T            | 45.76%                 | 94                                              | 53                                              | 78                                              | 46                                              | 63%                                                     | 37%                                                     | Synonymous variant     | MDV020 | DNA helicase-primase subunit; I   |
| Farm B/dust | 65843                  | A            | G            | 11.30%                 | 39                                              | 118                                             | 5                                               | 15                                              | 25%                                                     | 75%                                                     | Non-synonymous variant | MDV049 | large tegument protein; VP1/2 (I  |
| Farm B/dust | 86626                  | T            | C            | 40.19%                 | 114                                             | 78                                              | 78                                              | 51                                              | 60%                                                     | 40%                                                     | Non-synonymous variant | MDV056 | UL43 homolog; probably membe      |
| Farm B/dust | 108743                 | T            | C            | 41.74%                 | 173                                             | 95                                              | 119                                             | 73                                              | 62%                                                     | 38%                                                     | Genic_UTR              | MDV072 | LORF5; function unknown; no h     |
| Farm B/dust | 115231                 | A            | C            | 21.80%                 | 127                                             | 221                                             | 36                                              | 61                                              | 37%                                                     | 63%                                                     | Intergenic             | N/A    | N/A                               |
| Farm B/dust | 115232                 | A            | C            | 14.99%                 | 161                                             | 270                                             | 19                                              | 57                                              | 25%                                                     | 75%                                                     | Intergenic             | N/A    | N/A                               |
| Farm B/dust | 121656                 | C            | T            | 37.22%                 | 76                                              | 118                                             | 43                                              | 72                                              | 37%                                                     | 63%                                                     | Genic_UTR              | MDV076 | Meq; oncogene; role in tumor fo   |
| Farm B/dust | 124841                 | T            | C            | 41.75%                 | 188                                             | 151                                             | 130                                             | 113                                             | 53%                                                     | 47%                                                     | Intergenic             | N/A    | N/A                               |
| Farm B/dust | 137449                 | A            | C            | 45.05%                 | 149                                             | 62                                              | 103                                             | 70                                              | 60%                                                     | 40%                                                     | Intergenic             | N/A    | N/A                               |
| Farm B/dust | 138199                 | T            | A            | 5.64%                  | 393                                             | 142                                             | 24                                              | 8                                               | 75%                                                     | 25%                                                     | Intergenic             | N/A    | N/A                               |
| Farm B/dust | 138267                 | C            | A            | 37.23%                 | 145                                             | 231                                             | 81                                              | 142                                             | 36%                                                     | 64%                                                     | Intergenic             | N/A    | N/A                               |
| Farm B/dust | 138268                 | A            | C            | 7.74%                  | 188                                             | 396                                             | 25                                              | 24                                              | 51%                                                     | 49%                                                     | Intergenic             | N/A    | N/A                               |
| Farm B/dust | 138355                 | C            | G            | 5.22%                  | 83                                              | 407                                             | 9                                               | 18                                              | 33%                                                     | 67%                                                     | Intergenic             | N/A    | N/A                               |
| Farm B/dust | 138356                 | G            | A            | 12.99%                 | 74                                              | 368                                             | 15                                              | 51                                              | 23%                                                     | 77%                                                     | Intergenic             | N/A    | N/A                               |
| Farm B/dust | 138361                 | A            | C            | 5.24%                  | 89                                              | 381                                             | 6                                               | 20                                              | 23%                                                     | 77%                                                     | Intergenic             | N/A    | N/A                               |
| Farm B/dust | 138510                 | A            | G            | 27.94%                 | 25                                              | 73                                              | 10                                              | 28                                              | 26%                                                     | 74%                                                     | Intergenic             | N/A    | N/A                               |

**Farm A/dust 1 (low stringency)**

| Isolate       | Position in the genome | Major allele | Minor allele | Minor allele frequency | Reads supporting major allele on forward strand | Reads supporting major allele on reverse strand | Reads supporting minor allele on forward strand | Reads supporting minor allele on reverse strand | Percent reads supporting minor allele on forward strand | Percent reads supporting minor allele on reverse strand | Type of variation      | Gene   | Gene                            |
|---------------|------------------------|--------------|--------------|------------------------|-------------------------------------------------|-------------------------------------------------|-------------------------------------------------|-------------------------------------------------|---------------------------------------------------------|---------------------------------------------------------|------------------------|--------|---------------------------------|
| Farm A/dust 1 | 30905                  | G            | A            | 7.61%                  | 53                                              | 32                                              | 2                                               | 5                                               | 29%                                                     | 71%                                                     | Synonymous variant     | MDV030 | capsid protein VP23; UL18 hom   |
| Farm A/dust 1 | 40519                  | G            | A            | 17.78%                 | 56                                              | 18                                              | 12                                              | 4                                               | 75%                                                     | 25%                                                     | Non-synonymous variant | MDV034 | gH; glycoprotein H; UL22 homol  |
| Farm A/dust 1 | 43053                  | G            | A            | 17.24%                 | 48                                              | 24                                              | 12                                              | 3                                               | 80%                                                     | 20%                                                     | Genic_UTR              | MDV035 | UL24 homolog; nuclear protein   |
| Farm A/dust 1 | 113439                 | G            | T            | 7.61%                  | 66                                              | 19                                              | 6                                               | 1                                               | 86%                                                     | 14%                                                     | Non-synonymous variant | MDV073 | pp38; 38 kDa phosphoprotein; r  |
| Farm A/dust 1 | 115376                 | C            | A            | 8.16%                  | 93                                              | 42                                              | 6                                               | 6                                               | 50%                                                     | 50%                                                     | Intergenic             | N/A    | N/A                             |
| Farm A/dust 1 | 115377                 | C            | A            | 29.20%                 | 51                                              | 29                                              | 21                                              | 12                                              | 64%                                                     | 36%                                                     | Intergenic             | N/A    | N/A                             |
| Farm A/dust 1 | 117527                 | G            | T            | 4.55%                  | 132                                             | 57                                              | 6                                               | 3                                               | 67%                                                     | 33%                                                     | Intergenic             | N/A    | N/A                             |
| Farm A/dust 1 | 121803                 | C            | T            | 26.11%                 | 92                                              | 41                                              | 39                                              | 8                                               | 83%                                                     | 17%                                                     | Genic_UTR              | MDV076 | Meq; oncogene; role in tumor fo |
| Farm A/dust 1 | 126256                 | T            | G            | 12.96%                 | 43                                              | 4                                               | 4                                               | 3                                               | 57%                                                     | 43%                                                     | Intergenic             | N/A    | N/A                             |
| Farm A/dust 1 | 132086                 | T            | C            | 11.97%                 | 108                                             | 17                                              | 14                                              | 3                                               | 82%                                                     | 18%                                                     | Non-synonymous variant | MDV084 | ICP4 (RS1) homolog; transactiv  |
| Farm A/dust 1 | 137099                 | A            | C            | 34.74%                 | 42                                              | 20                                              | 18                                              | 15                                              | 55%                                                     | 45%                                                     | Intergenic             | N/A    | N/A                             |
| Farm A/dust 1 | 137100                 | A            | C            | 8.41%                  | 58                                              | 40                                              | 8                                               | 1                                               | 89%                                                     | 11%                                                     | Intergenic             | N/A    | N/A                             |
| Farm A/dust 1 | 137101                 | A            | C            | 5.93%                  | 75                                              | 36                                              | 4                                               | 3                                               | 57%                                                     | 43%                                                     | Intergenic             | N/A    | N/A                             |
| Farm A/dust 1 | 137264                 | A            | G            | 5.22%                  | 87                                              | 40                                              | 5                                               | 2                                               | 71%                                                     | 29%                                                     | Intergenic             | N/A    | N/A                             |
| Farm A/dust 1 | 138209                 | C            | A            | 8.27%                  | 88                                              | 34                                              | 8                                               | 3                                               | 73%                                                     | 27%                                                     | Intergenic             | N/A    | N/A                             |
| Farm A/dust 1 | 138212                 | C            | G            | 6.29%                  | 93                                              | 41                                              | 8                                               | 1                                               | 89%                                                     | 11%                                                     | Intergenic             | N/A    | N/A                             |
| Farm A/dust 1 | 138213                 | T            | A            | 7.87%                  | 77                                              | 40                                              | 9                                               | 1                                               | 90%                                                     | 10%                                                     | Intergenic             | N/A    | N/A                             |
| Farm A/dust 1 | 138281                 | A            | C            | 12.82%                 | 47                                              | 21                                              | 6                                               | 4                                               | 60%                                                     | 40%                                                     | Intergenic             | N/A    | N/A                             |
| Farm A/dust 1 | 138377                 | G            | C            | 8.33%                  | 60                                              | 50                                              | 1                                               | 9                                               | 10%                                                     | 90%                                                     | Intergenic             | N/A    | N/A                             |
| Farm A/dust 1 | 138379                 | A            | C            | 9.71%                  | 39                                              | 54                                              | 1                                               | 9                                               | 10%                                                     | 90%                                                     | Intergenic             | N/A    | N/A                             |
| Farm A/dust 1 | 138381                 | A            | T            | 10.78%                 | 44                                              | 47                                              | 2                                               | 9                                               | 18%                                                     | 82%                                                     | Intergenic             | N/A    | N/A                             |
| Farm A/dust 1 | 138490                 | A            | T            | 12.64%                 | 56                                              | 20                                              | 3                                               | 8                                               | 27%                                                     | 73%                                                     | Intergenic             | N/A    | N/A                             |
| Farm A/dust 1 | 138492                 | C            | T            | 10.84%                 | 52                                              | 22                                              | 2                                               | 7                                               | 22%                                                     | 78%                                                     | Intergenic             | N/A    | N/A                             |
| Farm A/dust 1 | 138523                 | A            | G            | 35.48%                 | 31                                              | 9                                               | 12                                              | 10                                              | 55%                                                     | 45%                                                     | Intergenic             | N/A    | N/A                             |

Supplemental Table S5. Summary and annotation of all polymorphic loci detected in MDV1 consensus genomes. DNA from dust: comparative genomics of large DNA viruses in field surveillance samples

### Farm A/dust 2 (low stringency)

| Isolate       | Position in the genome | Major allele | Minor allele | Minor allele frequency | Reads supporting major allele on forward strand | Reads supporting minor allele on reverse strand | Reads supporting minor allele on forward strand | Reads supporting minor allele on reverse strand | Percent reads supporting minor allele on forward strand | Percent reads supporting minor allele on reverse strand | Type of variation      | Gene   | Gene                             |
|---------------|------------------------|--------------|--------------|------------------------|-------------------------------------------------|-------------------------------------------------|-------------------------------------------------|-------------------------------------------------|---------------------------------------------------------|---------------------------------------------------------|------------------------|--------|----------------------------------|
|               |                        |              |              |                        |                                                 |                                                 |                                                 |                                                 |                                                         |                                                         |                        |        |                                  |
| Farm A/dust 2 | 7251                   | G            | A            | 5.14%                  | 63                                              | 103                                             | 1                                               | 8                                               | 11%                                                     | 88.89%                                                  | Intergenic             | N/A    | N/A                              |
| Farm A/dust 2 | 22829                  | A            | G            | 4.35%                  | 105                                             | 71                                              | 6                                               | 2                                               | 75%                                                     | 25.00%                                                  | Non-synonymous variant | MDV025 | serine/threonine kinase; UL13 h  |
| Farm A/dust 2 | 40519                  | G            | A            | 19.75%                 | 51                                              | 79                                              | 14                                              | 18                                              | 44%                                                     | 56.25%                                                  | Non-synonymous variant | MDV034 | gH, glycoprotein H; UL22 homolog |
| Farm A/dust 2 | 48554                  | C            | T            | 9.68%                  | 114                                             | 54                                              | 13                                              | 5                                               | 72%                                                     | 27.78%                                                  | Non-synonymous variant | MDV040 | gB, glycoprotein B; UL27 homolog |
| Farm A/dust 2 | 109048                 | G            | A            | 5.57%                  | 186                                             | 102                                             | 2                                               | 15                                              | 12%                                                     | 88.24%                                                  | Genic_UTR              | MDV072 | LORF5; function unknown; no H    |
| Farm A/dust 2 | 115422                 | C            | T            | 2.47%                  | 178                                             | 134                                             | 1                                               | 7                                               | 13%                                                     | 87.50%                                                  | Intergenic             | N/A    | N/A                              |
| Farm A/dust 2 | 115441                 | A            | C            | 2.20%                  | 129                                             | 225                                             | 6                                               | 2                                               | 75%                                                     | 25.00%                                                  | Intergenic             | N/A    | N/A                              |
| Farm A/dust 2 | 116937                 | G            | A            | 12.67%                 | 86                                              | 176                                             | 11                                              | 27                                              | 29%                                                     | 71.05%                                                  | Intergenic             | N/A    | N/A                              |
| Farm A/dust 2 | 121872                 | T            | C            | 36.76%                 | 52                                              | 108                                             | 35                                              | 58                                              | 38%                                                     | 62.37%                                                  | Genic_UTR              | MDV076 | Meq; oncogene; role in tumor fo  |
| Farm A/dust 2 | 126692                 | C            | G            | 26.35%                 | 108                                             | 1                                               | 33                                              | 6                                               | 85%                                                     | 15.38%                                                  | Intergenic             | N/A    | N/A                              |
| Farm A/dust 2 | 126693                 | C            | T            | 27.21%                 | 105                                             | 1                                               | 33                                              | 7                                               | 83%                                                     | 17.50%                                                  | Intergenic             | N/A    | N/A                              |
| Farm A/dust 2 | 130968                 | G            | T            | 43.48%                 | 77                                              | 105                                             | 52                                              | 88                                              | 37%                                                     | 62.86%                                                  | Non-synonymous variant | MDV084 | ICP4 (RS1) homolog; transactiv   |
| Farm A/dust 2 | 137156                 | C            | A            | 5.17%                  | 81                                              | 139                                             | 4                                               | 8                                               | 33%                                                     | 66.67%                                                  | Intergenic             | N/A    | N/A                              |
| Farm A/dust 2 | 137320                 | T            | A            | 9.94%                  | 120                                             | 41                                              | 3                                               | 15                                              | 17%                                                     | 83.33%                                                  | Intergenic             | N/A    | N/A                              |
| Farm A/dust 2 | 138433                 | C            | A            | 6.50%                  | 215                                             | 85                                              | 13                                              | 8                                               | 62%                                                     | 38.10%                                                  | Intergenic             | N/A    | N/A                              |
| Farm A/dust 2 | 138434                 | T            | A            | 4.43%                  | 202                                             | 89                                              | 7                                               | 7                                               | 50%                                                     | 50.00%                                                  | Intergenic             | N/A    | N/A                              |
| Farm A/dust 2 | 138436                 | C            | G            | 7.06%                  | 221                                             | 93                                              | 18                                              | 6                                               | 75%                                                     | 25.00%                                                  | Intergenic             | N/A    | N/A                              |
| Farm A/dust 2 | 138437                 | T            | A            | 8.12%                  | 219                                             | 96                                              | 20                                              | 8                                               | 71%                                                     | 28.57%                                                  | Intergenic             | N/A    | N/A                              |
| Farm A/dust 2 | 138451                 | G            | A            | 2.42%                  | 244                                             | 110                                             | 4                                               | 5                                               | 44%                                                     | 55.56%                                                  | Intergenic             | N/A    | N/A                              |
| Farm A/dust 2 | 138505                 | C            | A            | 28.26%                 | 75                                              | 139                                             | 58                                              | 33                                              | 64%                                                     | 36.26%                                                  | Intergenic             | N/A    | N/A                              |
| Farm A/dust 2 | 138506                 | A            | C            | 8.97%                  | 122                                             | 162                                             | 15                                              | 13                                              | 54%                                                     | 46.43%                                                  | Intergenic             | N/A    | N/A                              |
| Farm A/dust 2 | 138593                 | C            | G            | 6.17%                  | 81                                              | 222                                             | 10                                              | 10                                              | 50%                                                     | 50.00%                                                  | Intergenic             | N/A    | N/A                              |
| Farm A/dust 2 | 138594                 | G            | A            | 12.81%                 | 76                                              | 203                                             | 13                                              | 28                                              | 32%                                                     | 68.29%                                                  | Intergenic             | N/A    | N/A                              |
| Farm A/dust 2 | 138595                 | G            | C            | 5.02%                  | 84                                              | 219                                             | 7                                               | 9                                               | 44%                                                     | 56.25%                                                  | Intergenic             | N/A    | N/A                              |
| Farm A/dust 2 | 138596                 | T            | C            | 5.61%                  | 81                                              | 220                                             | 10                                              | 8                                               | 56%                                                     | 44.44%                                                  | Intergenic             | N/A    | N/A                              |
| Farm A/dust 2 | 138599                 | A            | C            | 5.38%                  | 87                                              | 211                                             | 5                                               | 12                                              | 29%                                                     | 70.59%                                                  | Intergenic             | N/A    | N/A                              |
| Farm A/dust 2 | 138600                 | G            | C            | 2.59%                  | 90                                              | 210                                             | 1                                               | 7                                               | 13%                                                     | 87.50%                                                  | Intergenic             | N/A    | N/A                              |
| Farm A/dust 2 | 138600                 | G            | C            | 2.59%                  | 90                                              | 210                                             | 1                                               | 7                                               | 13%                                                     | 87.50%                                                  | Intergenic             | N/A    | N/A                              |
| Farm A/dust 2 | 138601                 | G            | T            | 2.97%                  | 81                                              | 213                                             | 6                                               | 3                                               | 67%                                                     | 33.33%                                                  | Intergenic             | N/A    | N/A                              |
| Farm A/dust 2 | 138601                 | G            | T            | 2.97%                  | 81                                              | 213                                             | 6                                               | 3                                               | 67%                                                     | 33.33%                                                  | Intergenic             | N/A    | N/A                              |
| Farm A/dust 2 | 138602                 | G            | C            | 4.15%                  | 77                                              | 197                                             | 3                                               | 9                                               | 25%                                                     | 75.00%                                                  | Intergenic             | N/A    | N/A                              |
| Farm A/dust 2 | 138602                 | G            | C            | 4.15%                  | 77                                              | 197                                             | 3                                               | 9                                               | 25%                                                     | 75.00%                                                  | Intergenic             | N/A    | N/A                              |
| Farm A/dust 2 | 138604                 | A            | C            | 4.96%                  | 77                                              | 191                                             | 5                                               | 9                                               | 36%                                                     | 64.29%                                                  | Intergenic             | N/A    | N/A                              |
| Farm A/dust 2 | 138604                 | A            | C            | 4.96%                  | 77                                              | 191                                             | 5                                               | 9                                               | 36%                                                     | 64.29%                                                  | Intergenic             | N/A    | N/A                              |
| Farm A/dust 2 | 138606                 | A            | T            | 4.63%                  | 75                                              | 192                                             | 3                                               | 10                                              | 23%                                                     | 76.92%                                                  | Intergenic             | N/A    | N/A                              |
| Farm A/dust 2 | 138606                 | A            | T            | 4.63%                  | 75                                              | 192                                             | 3                                               | 10                                              | 23%                                                     | 76.92%                                                  | Intergenic             | N/A    | N/A                              |
| Farm A/dust 2 | 138748                 | A            | G            | 17.82%                 | 12                                              | 65                                              | 5                                               | 13                                              | 28%                                                     | 72.22%                                                  | Intergenic             | N/A    | N/A                              |
| Farm A/dust 2 | 138748                 | A            | G            | 17.82%                 | 12                                              | 65                                              | 5                                               | 13                                              | 28%                                                     | 72.22%                                                  | Intergenic             | N/A    | N/A                              |

### Farm B/dust (low stringency)

| Isolate     | Position in the genome | Major allele | Minor allele | Minor allele frequency | Reads supporting major allele on forward strand | Reads supporting minor allele on reverse strand | Reads supporting minor allele on forward strand | Reads supporting minor allele on reverse strand | Percent reads supporting minor allele on forward strand | Percent reads supporting minor allele on reverse strand | Type of variation      | Gene   | Gene                               |
|-------------|------------------------|--------------|--------------|------------------------|-------------------------------------------------|-------------------------------------------------|-------------------------------------------------|-------------------------------------------------|---------------------------------------------------------|---------------------------------------------------------|------------------------|--------|------------------------------------|
|             |                        |              |              |                        |                                                 |                                                 |                                                 |                                                 |                                                         |                                                         |                        |        |                                    |
| Farm B/dust | 2072                   | T            | G            | 44%                    | 90                                              | 43                                              | 68                                              | 37                                              | 64%                                                     | 36%                                                     | Non-synonymous variant | MDV010 | vLIP; lipase homolog; role in viri |
| Farm B/dust | 4411                   | G            | T            | 44%                    | 18                                              | 80                                              | 14                                              | 64                                              | 18%                                                     | 82%                                                     | Non-synonymous variant | MDV012 | LORF2; TAP transporter blocker     |
| Farm B/dust | 13809                  | G            | C            | 3%                     | 173                                             | 133                                             | 4                                               | 4                                               | 50%                                                     | 50%                                                     | Non-synonymous variant | MDV019 | virion morphogenesis & egress;     |
| Farm B/dust | 15775                  | C            | T            | 46%                    | 94                                              | 53                                              | 78                                              | 46                                              | 63%                                                     | 37%                                                     | Synonymous variant     | MDV020 | DNA helicase-primase subunit; I    |
| Farm B/dust | 65764                  | G            | A            | 10%                    | 66                                              | 93                                              | 3                                               | 14                                              | 18%                                                     | 82%                                                     | Non-synonymous variant | MDV049 | large tegument protein; VP1/2 (I   |
| Farm B/dust | 65773                  | G            | T            | 16%                    | 62                                              | 95                                              | 4                                               | 26                                              | 13%                                                     | 87%                                                     | Non-synonymous variant | MDV049 | large tegument protein; VP1/2 (I   |
| Farm B/dust | 65796                  | A            | G            | 35%                    | 53                                              | 85                                              | 9                                               | 66                                              | 12%                                                     | 88%                                                     | Synonymous variant     | MDV049 | large tegument protein; VP1/2 (I   |
| Farm B/dust | 65804                  | A            | T            | 34%                    | 61                                              | 89                                              | 11                                              | 67                                              | 14%                                                     | 86%                                                     | Non-synonymous variant | MDV049 | large tegument protein; VP1/2 (I   |
| Farm B/dust | 65821                  | G            | T            | 34%                    | 53                                              | 83                                              | 8                                               | 63                                              | 11%                                                     | 89%                                                     | Non-synonymous variant | MDV049 | large tegument protein; VP1/2 (I   |
| Farm B/dust | 65843                  | A            | G            | 11%                    | 39                                              | 118                                             | 5                                               | 15                                              | 25%                                                     | 75%                                                     | Non-synonymous variant | MDV049 | large tegument protein; VP1/2 (I   |
| Farm B/dust | 85939                  | A            | C            | 95%                    | 0                                               | 2                                               | 15                                              | 21                                              | 42%                                                     | 58%                                                     | Non-synonymous variant | MDV055 | DNA polymerase processivity st     |
| Farm B/dust | 85954                  | C            | T            | 29%                    | 14                                              | 18                                              | 11                                              | 2                                               | 85%                                                     | 15%                                                     | Non-synonymous variant | MDV055 | DNA polymerase processivity st     |
| Farm B/dust | 85959                  | C            | A            | 36%                    | 22                                              | 17                                              | 16                                              | 6                                               | 73%                                                     | 27%                                                     | Non-synonymous variant | MDV055 | DNA polymerase processivity st     |
| Farm B/dust | 85961                  | C            | A            | 39%                    | 28                                              | 16                                              | 20                                              | 8                                               | 71%                                                     | 29%                                                     | Non-synonymous variant | MDV055 | DNA polymerase processivity st     |
| Farm B/dust | 85962                  | G            | A            | 40%                    | 25                                              | 10                                              | 19                                              | 4                                               | 83%                                                     | 17%                                                     | Non-synonymous variant | MDV055 | DNA polymerase processivity st     |
| Farm B/dust | 85963                  | T            | C            | 56%                    | 7                                               | 12                                              | 18                                              | 6                                               | 75%                                                     | 25%                                                     | Non-synonymous variant | MDV055 | DNA polymerase processivity st     |
| Farm B/dust | 85966                  | G            | A            | 9%                     | 46                                              | 22                                              | 3                                               | 4                                               | 43%                                                     | 57%                                                     | Non-synonymous variant | MDV055 | DNA polymerase processivity st     |
| Farm B/dust | 85971                  | G            | C            | 11%                    | 47                                              | 18                                              | 4                                               | 4                                               | 50%                                                     | 50%                                                     | Non-synonymous variant | MDV055 | DNA polymerase processivity st     |
| Farm B/dust | 85974                  | G            | C            | 9%                     | 49                                              | 21                                              | 2                                               | 5                                               | 29%                                                     | 71%                                                     | Non-synonymous variant | MDV055 | DNA polymerase processivity st     |
| Farm B/dust | 86626                  | T            | C            | 40%                    | 114                                             | 78                                              | 78                                              | 51                                              | 60%                                                     | 40%                                                     | Non-synonymous variant | MDV056 | UL43 homolog; probably membi       |
| Farm B/dust | 108743                 | T            | C            | 42%                    | 173                                             | 95                                              | 119                                             | 73                                              | 62%                                                     | 38%                                                     | Genic_UTR              | MDV072 | LORF5; function unknown; no H      |
| Farm B/dust | 108856                 | A            | G            | 10%                    | 254                                             | 164                                             | 6                                               | 41                                              | 13%                                                     | 87%                                                     | Genic_UTR              | MDV072 | LORF5; function unknown; no H      |
| Farm B/dust | 108899                 | A            | G            | 11%                    | 227                                             | 192                                             | 7                                               | 45                                              | 13%                                                     | 87%                                                     | Genic_UTR              | MDV072 | LORF5; function unknown; no H      |
| Farm B/dust | 109012                 | T            | C            | 5%                     | 184                                             | 276                                             | 2                                               | 16                                              | 11%                                                     | 89%                                                     | Genic_UTR              | MDV072 | LORF5; function unknown; no H      |
| Farm B/dust | 114927                 | T            | C            | 2%                     | 331                                             | 276                                             | 13                                              | 2                                               | 87%                                                     | 13%                                                     | Intergenic             | N/A    | N/A                                |
| Farm B/dust | 115231                 | A            | C            | 22%                    | 127                                             | 221                                             | 36                                              | 61                                              | 37%                                                     | 63%                                                     | Intergenic             | N/A    | N/A                                |
| Farm B/dust | 115232                 | A            | C            | 15%                    | 161                                             | 270                                             | 19                                              | 57                                              | 25%                                                     | 75%                                                     | Intergenic             | N/A    | N/A                                |
| Farm B/dust | 115241                 | C            | A            | 4%                     | 155                                             | 360                                             | 17                                              | 6                                               | 74%                                                     | 26%                                                     | Intergenic             | N/A    | N/A                                |
| Farm B/dust | 116288                 | T            | A            | 2%                     | 309                                             | 248                                             | 3                                               | 9                                               | 25%                                                     | 75%                                                     | Intergenic             | N/A    | N/A                                |
| Farm B/dust | 120327                 | A            | G            | 29%                    | 4                                               | 64                                              | 3                                               | 25                                              | 11%                                                     | 89%                                                     | Intergenic             | N/A    | N/A                                |
| Farm B/dust | 121181                 | A            | C            | 2%                     | 203                                             | 194                                             | 4                                               | 6                                               | 40%                                                     | 60%                                                     | Non-synonymous variant | MDV076 | Meq; oncogene; role in tumor fo    |
| Farm B/dust | 121656                 | C            | T            | 37%                    | 76                                              | 118                                             | 43                                              | 72                                              | 37%                                                     | 63%                                                     | Genic_UTR              | MDV076 | Meq; oncogene; role in tumor fo    |
| Farm B/dust | 122052                 | A            | T            | 3%                     | 381                                             | 231                                             | 14                                              | 3                                               | 82%                                                     | 18%                                                     | Genic_UTR              | MDV076 | Meq; oncogene; role in tumor fo    |
| Farm B/dust | 124841                 | T            | C            | 42%                    | 188                                             | 151                                             | 130                                             | 113                                             | 53%                                                     | 47%                                                     | Intergenic             | N/A    | N/A                                |
| Farm B/dust | 127347                 | G            | T            | 42%                    | 35                                              | 178                                             | 22                                              | 130                                             | 14%                                                     | 86%                                                     | Intergenic             | N/A    | N/A                                |
| Farm B/dust | 137081                 | A            | C            | 4%                     | 97                                              | 66                                              | 1                                               | 6                                               | 14%                                                     | 86%                                                     | Intergenic             | N/A    | N/A                                |
| Farm B/dust | 137101                 | A            | G            | 2%                     | 137                                             | 198                                             | 7                                               | 1                                               | 88%                                                     | 13%                                                     | Intergenic             | N/A    | N/A                                |
| Farm B/dust | 137102                 | A            | G            | 4%                     | 119                                             | 199                                             | 10                                              | 2                                               | 83%                                                     | 17%                                                     | Intergenic             | N/A    | N/A                                |
| Farm B/dust | 137249                 | A            | G            | 3%                     | 112                                             | 193                                             | 7                                               | 1                                               | 88%                                                     | 13%                                                     | Intergenic             | N/A    | N/A                                |
| Farm B/dust | 137449                 | A            | C            | 45%                    | 149                                             | 62                                              | 103                                             | 70                                              | 60%                                                     | 40%                                                     | Intergenic             | N/A    | N/A                                |
| Farm B/dust | 138195                 | C            | A            | 4%                     | 402                                             | 137                                             | 15                                              | 5                                               | 75%                                                     | 25%                                                     | Intergenic             | N/A    | N/A                                |
| Farm B/dust | 138196                 | T            | A            | 3%                     | 383                                             | 138                                             | 10                                              | 7                                               | 59%                                                     | 41%                                                     | Intergenic             | N/A    | N/A                                |
| Farm B/dust | 138198                 | C            | G            | 5%                     | 405                                             | 142                                             | 18                                              | 8                                               | 69%                                                     | 31%                                                     | Intergenic             | N/A    | N/A                                |
| Farm B/dust | 138199                 | T            | A            | 6%                     | 393                                             | 142                                             | 24                                              | 8                                               | 75%                                                     | 25%                                                     | Intergenic             | N/A    | N/A                                |
| Farm B/dust | 138266                 | C            | A            | 4%                     | 266                                             | 386                                             | 19                                              | 9                                               | 68%                                                     | 32%                                                     | Intergenic             | N/A    | N/A                                |
| Farm B/dust | 138267                 | C            | A            | 37%                    | 145                                             | 231                                             | 81                                              | 142                                             | 36%                                                     | 64%                                                     | Intergenic             | N/A    | N/A                                |
| Farm B/dust | 138288                 | A            | C            | 8%                     | 188                                             | 396                                             | 25                                              | 24                                              | 51%                                                     | 49%                                                     | Intergenic             | N/A    | N/A                                |
| Farm B/dust | 138355                 | C            | G            | 5%                     | 83                                              | 407                                             | 9                                               | 18                                              | 33%                                                     | 67%                                                     | Intergenic             | N/A    | N/A                                |
| Farm B/dust | 138356                 | G            | A            | 13%                    | 74                                              | 368                                             | 15                                              | 51                                              | 23%                                                     | 77%                                                     | Intergenic             | N/A    | N/A                                |
| Farm B/dust | 138357                 | G            | C            | 4%                     | 83                                              | 397                                             | 5                                               | 14                                              | 26%                                                     | 74%                                                     | Intergenic             | N/A    | N/A                                |
| Farm B/dust | 138358                 | T            | C            | 4%                     | 82                                              | 399                                             | 8                                               | 12                                              | 40%                                                     | 60%                                                     | Intergenic             | N/A    | N/A                                |
| Farm B/dust | 138361                 | A            | C            | 5%                     | 89                                              | 381                                             | 6                                               | 20                                              | 23%                                                     | 77%                                                     | Intergenic             | N/A    | N/A                                |
| Farm B/dust | 138362                 | G            | C            | 3%                     | 95                                              | 379                                             | 2                                               | 11                                              | 15%                                                     | 85%                                                     | Intergenic             | N/A    | N/A                                |
| Farm B/dust | 138364                 | G            | C            | 4%                     | 80                                              | 355                                             | 5                                               | 15                                              | 25%                                                     | 75%                                                     | Intergenic             | N/A    | N/A                                |
| Farm B/dust | 138366                 | A            | C            | 5%                     | 79                                              | 343                                             | 8                                               | 14                                              | 36%                                                     | 64%                                                     | Intergenic             | N/A    | N/A                                |
| Farm B/dust | 138368                 | A            | T            | 3%                     | 79                                              | 345                                             | 2                                               | 13                                              | 13%                                                     | 87%                                                     | Intergenic             | N/A    | N/A                                |
| Farm B/dust | 138476                 | A            | C            | 4%                     | 111                                             | 79                                              | 2                                               | 5                                               | 29%                                                     | 71%                                                     | Intergenic             | N/A    | N/A                                |
| Farm B/dust | 138510                 | A            | G            | 28%                    | 25                                              | 73                                              | 10                                              | 28                                              | 26%                                                     | 74%                                                     | Intergenic             | N/A    | N/A                                |

Supplemental Table S5. Summary and annotation of all polymorphic loci detected in MDV1 consensus genomes.  
DNA from dust: comparative genomics of large DNA viruses in field surveillance samples

#### Farm B/feather 1 (low stringency)

| Isolate          | Position in the genome | Major allele | Minor allele | Minor allele frequency | Reads supporting major allele on forward strand | Reads supporting major allele on reverse strand | Reads supporting minor allele on forward strand | Reads supporting minor allele on reverse strand | Percent reads supporting minor allele on forward strand | Percent reads supporting minor allele on reverse strand | Type of variation      | Gene   | Gene                            |
|------------------|------------------------|--------------|--------------|------------------------|-------------------------------------------------|-------------------------------------------------|-------------------------------------------------|-------------------------------------------------|---------------------------------------------------------|---------------------------------------------------------|------------------------|--------|---------------------------------|
| Farm B/feather 1 | 12176                  | C            | A            | 15.56%                 | 17                                              | 20                                              | 6                                               | 1                                               | 86%                                                     | 14%                                                     | Non-synonymous variant | MDV018 | capsid portal protein; UL6 homc |
| Farm B/feather 1 | 23126                  | G            | T            | 12.28%                 | 28                                              | 21                                              | 2                                               | 5                                               | 29%                                                     | 71%                                                     | Non-synonymous variant | MDV025 | serine/threonine kinase; UL13 h |

#### Farm B/feather 2 (low stringency)

| Isolate          | Position in the genome | Major allele | Minor allele | Minor allele frequency | Reads supporting major allele on forward strand | Reads supporting major allele on reverse strand | Reads supporting minor allele on forward strand | Reads supporting minor allele on reverse strand | Percent reads supporting minor allele on forward strand | Percent reads supporting minor allele on reverse strand | Type of variation      | Gene   | Gene                            |
|------------------|------------------------|--------------|--------------|------------------------|-------------------------------------------------|-------------------------------------------------|-------------------------------------------------|-------------------------------------------------|---------------------------------------------------------|---------------------------------------------------------|------------------------|--------|---------------------------------|
| Farm B/feather 2 | 122174                 | C            | T            | 10.94%                 | 32                                              | 25                                              | 1                                               | 6                                               | 14%                                                     | 85.71%                                                  | Genic_UTR              | MDV076 | Meq; oncogene; role in tumor fo |
| Farm B/feather 2 | 122204                 | C            | T            | 15.79%                 | 21                                              | 27                                              | 2                                               | 7                                               | 22%                                                     | 77.78%                                                  | Genic_UTR              | MDV076 | Meq; oncogene; role in tumor fo |
| Farm B/feather 2 | 128489                 | G            | T            | 10.13%                 | 38                                              | 33                                              | 2                                               | 6                                               | 25%                                                     | 75.00%                                                  | Intergenic             | N/A    | N/A                             |
| Farm B/feather 2 | 144479                 | C            | A            | 14.00%                 | 33                                              | 10                                              | 5                                               | 2                                               | 71%                                                     | 28.57%                                                  | Non-synonymous variant | MDV092 | serine/threonine kinase; US3 hc |



*Supplemental Material for Pandey et al., DNA from dust: comparative genomics of vaccine-break virus in the field.*

**Supplemental Table S6: Chi-squared values from pairwise comparisons of different categories of polymorphisms.**

| <b>Sample*</b>       | <b>Intergenic vs. synonymous</b> | <b>Intergenic vs. non-synonymous</b> | <b>Intergenic vs. genic untranslated</b> | <b>Synonymous vs. non-synonymous</b> | <b>Synonymous vs. genic untranslated</b> | <b>Non-synonymous vs. genic untranslated</b> |
|----------------------|----------------------------------|--------------------------------------|------------------------------------------|--------------------------------------|------------------------------------------|----------------------------------------------|
| <b>Farm A-dust 1</b> | $\chi^2=16.6$<br>(p = <0.001)    | $\chi^2=55.47$<br>(p = <0.001)       | $\chi^2=3.74$<br>(p = 0.053)             | $\chi^2=0.03$<br>(p=0.873)           | $\chi^2=0.83$<br>(p = 0.361)             | $\chi^2=1.73$<br>(p = 0.189)                 |
| <b>Farm A-dust 2</b> | $\chi^2=31.76$<br>(p = <0.001)   | $\chi^2=94.93$<br>(p = <0.001)       | $\chi^2=9.48$<br>(p = 0.002)             | $\chi^2=1.11$<br>(p = 0.292)         | $\chi^2=2.72$<br>(p = 0.099)             | $\chi^2=0.69$<br>(p = 0.407)                 |
| <b>Farm B-dust</b>   | $\chi^2=25.27$<br>(p = <0.001)   | $\chi^2=47.32$<br>(p = <0.001)       | $\chi^2=5.39$<br>(p = 0.020)             | $\chi^2=1.83$<br>(p = 0.176)         | $\chi^2=1.61$<br>(p = 0.205)             | $\chi^2=0.09$<br>(p = 0.759)                 |

\*Degrees of freedom (d.f.) = 1 for all comparisons; p indicates p-value.
